# Supplementary material for: A quantitative approach on environment-food nexus: integrated modeling and indices for cumulative impact assessment of farm management practices
Source: PeerJ. 2023 Jan 30;11:e14816. doi: 10.7717/peerj.14816 (PMC9893910; doi:10.7717/peerj.14816)
Supplement: Supplemental Information 2 [file peerj-11-14816-s002.xlsx]

## Sheet: output
RES	MON	VOLUMEm3	Flow Reach	FLOW_INcms	FLOW_OUTcms	PRECIPm3	EVAPm3	SEEPAGEm3	SED_INtons	SED_OUTtons	SED_CONCppm	ORGN_INkg	ORGN_OUTkg	RES_ORGNppm	ORGP_INkg	ORGP_OUTkg	RES_ORGPppm	NO3_INkg	NO3_OUTkg	RES_NO3ppm	NO2_INkg	NO2_OUTkg	RES_NO2ppm	NH3_INkg	NH3_OUTkg	RES_NH3ppm	MINP_INkg	MINP_OUTkg	RES_MINPppm	CHLA_INkg	CHLA_OUTkg	mg/m3	SECCHIDEPTHm	PEST_INmg	REACTPSTmg	VOLPSTmg	SETTLPSTmg	RESUSP_PSTmg	DIFFUSEPSTmg	REACBEDPSTmg	BURYPSTmg	PEST_OUTmg	PSTCNCWmg/m3	PSTCNCBmg/m3
1	1	40060000	0.626	0.6259	0	434300	51310	0	54.45	0	1	4607	0	0.03165	3719	0	0.0251	3273	0	0.9235	24.66	0	0.0003146	368	0	0.003217	1400	0	0.01544	0	0	0	0.7228	0	0	0	0	0	0	0	0	0	0	0
1	2	44130000	1.45	1.453	0	759500	76830	0	149.6	0	1.037	5822	0	0.1753	5221	0	0.1335	7190	0	0.8553	7.506	0	0.0006121	294.3	0	0.01186	2444	0	0.05221	0.1551	0	0.00351462	0.5664	0	0	0	0	0	0	0	0	0	0	0
1	3	47750000	1.04	1.042	0	1004000	175700	0	114.3	0	1	4693	0	0.2305	8358	0	0.2189	6013	0	0.7687	0.6024	0	0.0005145	190.8	0	0.01328	927.2	0	0.06444	0.4862	0	0.0101822	0.5042	0	0	0	0	0	0	0	0	0	0	0
1	4	49890000	0.972	0.9716	0	370100	211300	0	94.79	0	1	3054	0	0.2508	2093	0	0.2273	6974	0	0.7376	1.211	0	0.0004205	163.6	0	0.01333	2024	0	0.06981	0	0	0	0.5185	0	0	0	0	0	0	0	0	0	0	0
1	5	51340000	0.644	0.6435	0	316000	312900	0	54.59	0	1	3287	0	0.2606	2055	0	0.1956	5726	0	0.7065	1.153	0	0.0003626	178.4	0	0.01412	1229	0	0.07605	0	0	0	0.5408	0	0	0	0	0	0	0	0	0	0	0
1	6	48860000	0.348	0.3478	0	0	376200	0	21.85	0	1	1956	0	0.2682	918.7	0	0.167	1665	0	0.6662	2.192	0	0.0003395	155.5	0	0.01496	710.5	0	0.07201	0	0	0	0.5667	0	0	0	0	0	0	0	0	0	0	0
1	7	48550000	0.0774	0.07737	0	0	238800	0	2.76	0	1	1829	0	0.2677	1012	0	0.142	78.94	0	0.588	3.245	0	0.0003468	277.2	0	0.01735	0.01556	0	0.05919	0	0	0	0.6131	0	0	0	0	0	0	0	0	0	0	0
1	8	41500000	0.0626	0.06261	0	86410	387300	0	2.051	0	1.001	1667	0	0.2763	918.2	0	0.1282	229.6	0	0.5355	2.18	0	0.0003682	225	0	0.02053	0.2016	0	0.04611	0	0	0	0.6263	0	0	0	0	0	0	0	0	0	0	0
1	9	35840000	0.0591	0.05914	0	0	210600	0	1.785	0	1.001	1700	0	0.3079	898	0	0.1269	171.8	0	0.5248	1.331	0	0.0003973	197.1	0	0.02484	0.01286	0	0.03849	0	0	0	0.6366	0	0	0	0	0	0	0	0	0	0	0
1	10	36330000	0.281	0.2813	0	5928	115800	0	17.32	0	1	2016	0	0.3186	917.5	0	0.1173	1249	0	0.4832	1.288	0	0.0003854	131.6	0	0.02611	503.7	0	0.0355	0	0	0	0.6609	0	0	0	0	0	0	0	0	0	0	0
1	11	34830000	0.285	0.2852	0	243700	80250	0	17.9	0	1	8440	0	0.4457	4080	0	0.1633	20590	0	0.8583	3.61	0	0.0004067	744.6	0	0.03737	426.7	0	0.03771	0	0	0	0.5782	0	0	0	0	0	0	0	0	0	0	0
1	12	37510000	0.919	0.9188	0	523900	52140	0	99.5	0	1	8222	0	0.5286	5409	0	0.2036	12460	0	0.9242	0.8352	0	0.0003684	456.8	0	0.04175	1026	0	0.04227	0.596	0	0.0158891	0.5194	0	0	0	0	0	0	0	0	0	0	0
1	2005	37510000	0.554	0.5543	0	3744000	2289000	0	630.9	0	1	47290	0	0.2801	35600	0	0.1537	65620	0	0.711	49.81	0	0.0003998	3383	0	0.0199	10690	0	0.05057	1.237	0	0.0329779	0.5194	0	0	0	0	0	0	0	0	0	0	0
1	1	44800000	2.47	2.469	0	753800	81840	0	369.7	0	1	12790	0	0.6055	13590	0	0.3044	35480	0	1.226	0.3398	0	0.0002823	398.3	0	0.0395	1854	0	0.05605	5.116	0	0.114196	0.4338	0	0	0	0	0	0	0	0	0	0	0
1	2	61940000	6.26	6.261	0	2636000	102200	0	937.2	0	1.037	23990	0	0.825	30230	0	0.6814	53460	0	1.673	0.8524	0	0.0001934	687.5	0	0.03795	3498	0	0.07866	11.9	0	0.192121	0.378	0	0	0	0	0	0	0	0	0	0	0
1	3	64470000	0.953	0.9531	0	250500	275300	0	97.67	0	1	2866	0	0.6952	1675	0	0.5195	4988	0	1.534	0.1816	0	0.0001443	83.07	0	0.03015	835	0	0.07548	0.09546	0	0.00148069	0.4184	0	0	0	0	0	0	0	0	0	0	0
1	4	64990000	2.75	2.752	2.568	843200	254400	0	414.4	6.656	1	8191	4308	0.6395	6555	2914	0.4281	20340	9345	1.398	0.3934	0.7818	0.0001164	253.5	178.2	0.02651	2461	489.1	0.07381	3.78	475.5	0.0581628	0.4401	0	0	0	0	0	0	0	0	0	0	0
1	5	64990000	1.22	1.224	1.197	568800	362600	0	137	3.206	1	2757	1816	0.5562	1245	1076	0.3225	7290	4105	1.26	0.2364	0.3138	9.554e-05	94.61	74.09	0.02265	1210	236	0.07262	0.1968	193.4	0.00302816	0.4838	0	0	0	0	0	0	0	0	0	0	0
1	6	63460000	0.713	0.7126	0.003333	0	370900	0	60.88	0.008641	1	2071	4.482	0.4999	914	2.393	0.2495	1845	10.12	1.109	0.3053	0.0007575	8.414e-05	79	0.1811	0.02016	703.7	0.5965	0.06542	0	0.4589	0	0.5191	0	0	0	0	0	0	0	0	0	0	0
1	7	63900000	0.418	0.4177	0	0	403800	0	29.54	0	1	2087	0	0.4565	954.1	0	0.1982	234.8	0	0.9588	0.4019	0	7.693e-05	99.77	0	0.0185	0	0	0.05291	0	0	0	0.5694	0	0	0	0	0	0	0	0	0	0	0
1	8	57530000	0.378	0.3781	0	0	465000	0	25.38	0	1.001	2010	0	0.4351	934	0	0.1656	500.4	0	0.855	0.4441	0	7.46e-05	105	0	0.01794	0	0	0.04067	0	0	0	0.5975	0	0	0	0	0	0	0	0	0	0	0
1	9	52510000	0.352	0.3519	0	0	319300	0	22.72	0	1.001	2011	0	0.4384	907	0	0.1483	344.7	0	0.8035	0.2662	0	7.545e-05	83.57	0	0.01828	0	0	0.03289	0	0	0	0.6254	0	0	0	0	0	0	0	0	0	0	0
1	10	55600000	0.853	0.8532	0	1190000	228400	0	91.02	0	1	6752	0	0.4199	3166	0	0.1285	4629	0	0.7188	0.7813	0	6.957e-05	341.6	0	0.0174	1099	0	0.03234	1.211	0	0.0217806	0.604	0	0	0	0	0	0	0	0	0	0	0
1	11	57510000	1.35	1.345	0	974300	150700	0	153.8	0	1	8360	0	0.5223	3934	0	0.1727	14080	0	0.77	1.161	0	8.039e-05	418.1	0	0.024	1696	0	0.04749	1.266	0	0.0220136	0.5783	0	0	0	0	0	0	0	0	0	0	0
1	12	58520000	0.469	0.4691	0	95620	94300	0	34.15	0	1	2292	0	0.4805	976.7	0	0.1438	1386	0	0.7237	0.1212	0	7.119e-05	44.78	0	0.02131	399	0	0.04675	0	0	0	0.6236	0	0	0	0	0	0	0	0	0	0	0
1	2006	58520000	1.46	1.462	0.313	7312000	3109000	0	2373	9.871	1	76180	6129	0.5435	65080	3992	0.2839	144600	13460	1.077	5.485	1.096	0.0001128	2689	252.4	0.02434	13760	725.7	0.05587	23.57	669.4	0.402768	0.6236	0	0	0	0	0	0	0	0	0	0	0
1	1	60340000	0.586	0.5864	0	317400	75010	0	47.77	0	1	2296	0	0.4295	989.5	0	0.1166	2409	0	0.6265	0.07467	0	5.977e-05	40.17	0	0.01813	740.5	0	0.04145	0	0	0	0.6609	0	0	0	0	0	0	0	0	0	0	0
1	2	64990000	1.79	1.785	0.2362	1158000	117800	0	206.9	0.551	1.037	4760	214.7	0.4182	4056	69.02	0.1324	18310	395.6	0.6909	0.1776	0.02547	5.149e-05	134.6	8.376	0.01665	1565	26.75	0.04677	1.148	17.34	0.0176643	0.6218	0	0	0	0	0	0	0	0	0	0	0
1	3	64990000	1.17	1.168	1.278	502500	208400	0	129.6	3.422	1	4258	1268	0.3701	3199	410.2	0.1184	13290	2498	0.7289	0.176	0.1428	4.195e-05	133.3	48.36	0.01413	1194	168.3	0.04918	0.5081	105.5	0.00781813	0.6134	0	0	0	0	0	0	0	0	0	0	0
1	4	64990000	3	2.999	3.455	1925000	200900	0	467	8.957	1	9654	3532	0.3939	6797	1415	0.1575	41230	8398	0.9536	0.8689	0.3613	4.042e-05	373.3	134.4	0.01499	2947	529.2	0.05968	3.139	333.5	0.0482997	0.5575	0	0	0	0	0	0	0	0	0	0	0
1	5	64990000	0.994	0.9942	0.7873	237000	512200	0	100.4	2.109	1	2521	804.4	0.3798	1130	315.9	0.1483	7685	2245	1.062	0.2621	0.08116	3.83e-05	84.84	30.36	0.01433	1108	139.8	0.06605	0.004933	78.3	7.5904e-05	0.5951	0	0	0	0	0	0	0	0	0	0	0
1	6	63510000	0.672	0.6717	0.01	122600	315500	0	55.93	0.02592	1	2060	9.326	0.3518	913.2	3.395	0.1219	1884	26.07	0.9575	0.3403	0.0009424	3.611e-05	80.25	0.3503	0.01321	672.6	1.627	0.0599	0	0.886	0	0.6263	0	0	0	0	0	0	0	0	0	0	0
1	7	63930000	0.39	0.3902	0	0	347300	0	26.54	0	1	2065	0	0.3298	953.3	0	0.1033	270.5	0	0.8292	0.4692	0	3.698e-05	106.3	0	0.01266	0	0	0.04862	0	0	0	0.6775	0	0	0	0	0	0	0	0	0	0	0
1	8	57470000	0.353	0.3534	0	0	499200	0	23.68	0	1.001	2019	0	0.3235	934	0	0.09285	532.2	0	0.7423	0.4905	0	4.047e-05	104.3	0	0.01284	0.007338	0	0.03745	0	0	0	0.6994	0	0	0	0	0	0	0	0	0	0	0
1	9	52410000	0.329	0.3289	0	0	296600	0	20.27	0	1.001	1982	0	0.3343	905.9	0	0.08938	339	0	0.6987	0.3256	0	4.437e-05	92.85	0	0.01359	0	0	0.03027	0	0	0	0.7198	0	0	0	0	0	0	0	0	0	0	0
1	10	53240000	0.457	0.4565	0	0	243400	0	33.52	0	1	2113	0	0.3271	930.5	0	0.08242	763.3	0	0.6191	0.1991	0	4.308e-05	70.28	0	0.01324	341	0	0.02588	0	0	0	0.7505	0	0	0	0	0	0	0	0	0	0	0
1	11	51890000	0.457	0.4569	0	55960	188200	0	32.41	0	1	2114	0	0.3135	910.2	0	0.07538	1993	0	0.5495	0.1219	0	3.897e-05	55	0	0.01228	451	0	0.02551	0	0	0	0.7589	0	0	0	0	0	0	0	0	0	0	0
1	12	54840000	0.839	0.8388	0	1034000	79140	0	87.1	0	1	6977	0	0.3589	3808	0	0.1055	20860	0	0.7669	0.5821	0	4.006e-05	279	0	0.01408	843.3	0	0.02996	2.555	0	0.0465901	0.6784	0	0	0	0	0	0	0	0	0	0	0
1	2007	54840000	0.905	0.9049	0.4777	5351000	3084000	0	1231	15.06	1	42820	5828	0.3594	25530	2214	0.1115	109600	13560	0.7672	4.088	0.6116	4.248e-05	1554	221.9	0.01412	9862	865.7	0.04323	7.355	535.5	0.134117	0.6784	0	0	0	0	0	0	0	0	0	0	0
1	1	57330000	0.786	0.7858	0	488700	101000	0	72.23	0	1	2381	0	0.3423	1058	0	0.09668	4260	0	0.705	0.07177	0	3.566e-05	43.9	0	0.01285	1379	0	0.03665	0	0	0	0.6878	0	0	0	0	0	0	0	0	0	0	0
1	2	62930000	1.98	1.983	0	751200	125500	0	249.9	0	1	3093	0	0.3106	1826	0	0.08567	11930	0	0.6715	0.1274	0	2.951e-05	82.5	0	0.01104	3917	0	0.06384	0.2246	0	0.00356904	0.6282	0	0	0	0	0	0	0	0	0	0	0
1	3	64990000	1.69	1.694	1.064	677900	302000	0	223.7	2.849	1	5182	879.8	0.3021	4030	318.1	0.0997	17800	2144	0.7426	0.41	0.07574	2.664e-05	175.4	30.47	0.01047	2355	241.5	0.08467	1.2	98.4	0.0184644	0.5951	0	0	0	0	0	0	0	0	0	0	0
1	4	64990000	0.491	0.491	0.188	26540	272100	0	36	0.4873	1	2155	144.6	0.2958	943.2	49.63	0.1009	1895	361.1	0.7356	0.2489	0.01283	2.627e-05	74.44	5.005	0.01024	504.4	38.32	0.07771	0	15.78	0	0.6354	0	0	0	0	0	0	0	0	0	0	0
1	5	64990000	0.515	0.5151	0.3296	67310	285100	0	40.35	0.8828	1	2138	245.5	0.2773	940.8	76.32	0.08584	2660	575.4	0.6483	0.4089	0.02306	2.621e-05	79.46	8.507	0.009612	579.4	56.61	0.06359	0	24.91	0	0.6746	0	0	0	0	0	0	0	0	0	0	0
1	6	62440000	0.318	0.3175	0.003333	0	365900	0	19.74	0.008642	1	1999	2.324	0.2679	918.4	0.6882	0.07679	891.3	5.284	0.5829	1.076	0.0002403	3.436e-05	105.1	0.08142	0.009608	218.3	0.501	0.05276	0	0.2277	0	0.7051	0	0	0	0	0	0	0	0	0	0	0
1	7	62240000	0.216	0.2155	0	0	493800	0	11.85	0	1	1957	0	0.2608	942.5	0	0.07067	217.1	0	0.5103	1.056	0	4.451e-05	140.6	0	0.01014	0	0	0.04111	0	0	0	0.7505	0	0	0	0	0	0	0	0	0	0	0
1	8	55620000	0.199	0.1991	0	9448	250900	0	10.38	0	1.001	1893	0	0.2625	929.8	0	0.0683	537.7	0	0.4612	1.257	0	5.931e-05	148.7	0	0.01136	0	0	0.0318	0	0	0	0.7629	0	0	0	0	0	0	0	0	0	0	0
1	9	50230000	0.186	0.1858	0	17680	280900	0	8.777	0	1.001	1893	0	0.2788	904.3	0	0.07039	366.9	0	0.4416	0.7409	0	7.317e-05	123.1	0	0.01301	0	0	0.02588	0	0	0	0.7719	0	0	0	0	0	0	0	0	0	0	0
1	10	52150000	0.678	0.6778	0	390900	134300	0	59.39	0	1	2729	0	0.2792	1339	0	0.06903	6040	0	0.4211	0.4637	0	7.324e-05	131.9	0	0.01325	1255	0	0.03032	0	0	0	0.7333	0	0	0	0	0	0	0	0	0	0	0
1	11	51560000	0.647	0.647	0	255700	119600	0	53.16	0	1	2923	0	0.2848	1429	0	0.07451	3757	0	0.4536	0.3072	0	6.694e-05	117.9	0	0.0134	1125	0	0.04175	0	0	0	0.7022	0	0	0	0	0	0	0	0	0	0	0
1	12	52240000	0.318	0.3181	0	161700	83780	0	19.88	0	1	2634	0	0.2872	1273	0	0.07572	3388	0	0.4334	0.142	0	6.005e-05	83.24	0	0.01298	373.6	0	0.04224	0	0	0	0.7195	0	0	0	0	0	0	0	0	0	0	0
1	2008	52240000	0.665	0.6648	0.1337	2847000	2815000	0	805.4	4.228	1	30980	1272	0.2874	16540	444.8	0.08117	53750	3086	0.5668	6.31	0.1119	4.637e-05	1306	44.06	0.0115	11710	336.9	0.04928	1.424	139.3	0.0272588	0.7195	0	0	0	0	0	0	0	0	0	0	0
1	1	53180000	0.278	0.2783	0	288700	99610	0	16.83	0	1	2286	0	0.281	1062	0	0.07373	1241	0	0.4094	0.1147	0	5.174e-05	60.97	0	0.01199	333.9	0	0.0357	0	0	0	0.7456	0	0	0	0	0	0	0	0	0	0	0
1	2	55770000	0.846	0.8463	0	732400	113800	0	74.39	0	1.037	5592	0	0.312	4328	0	0.1045	5595	0	0.4077	0.4997	0	4.939e-05	226.7	0	0.01289	1010	0	0.03773	0.6438	0	0.0115438	0.6451	0	0	0	0	0	0	0	0	0	0	0
1	3	60930000	1.71	1.709	0	722000	140100	0	220.3	0	1	6400	0	0.3263	5114	0	0.1321	32780	0	0.5261	0.3921	0	4.486e-05	253.8	0	0.0134	2687	0	0.05261	0.987	0	0.0161989	0.5753	0	0	0	0	0	0	0	0	0	0	0
1	4	64980000	1.7	1.696	0.006667	579500	365700	0	206.2	0.01728	1	3859	5.62	0.3336	2045	2.282	0.1417	33050	19.4	0.9573	0.2352	0.0006408	3.949e-05	120.8	0.2205	0.01335	2662	1.373	0.07275	0.2919	0.6314	0.00449215	0.5791	0	0	0	0	0	0	0	0	0	0	0
1	5	64980000	0.516	0.5158	0.2795	39820	395200	0	39.57	0.7487	1	2292	237.4	0.3138	1010	91.96	0.1194	4765	811.9	1.066	0.4908	0.0274	3.672e-05	85.61	9.26	0.01223	511.4	55.48	0.07173	0	25.9	0	0.622	0	0	0	0	0	0	0	0	0	0	0
1	6	62780000	0.455	0.4545	0.001014	45860	423100	0	32.13	0.002628	1	1998	0.7958	0.2989	903.5	0.2843	0.1017	2024	2.628	0.9553	0.9843	0.0001	4.218e-05	98.46	0.03106	0.01179	620	0.1685	0.06084	0	0.08218	0	0.6492	0	0	0	0	0	0	0	0	0	0	0
1	7	62650000	0.21	0.21	0	0	410900	0	11.11	0	1	2003	0	0.287	965.5	0	0.08926	234.1	0	0.836	1.062	0	5.206e-05	144.3	0	0.01202	0.004646	0	0.04955	0	0	0	0.6973	0	0	0	0	0	0	0	0	0	0	0
1	8	55880000	0.186	0.1863	0	0	356800	0	9.086	0	1.001	1921	0	0.2864	930.5	0	0.08274	539.8	0	0.7529	0.9597	0	6.258e-05	134.8	0	0.01287	0.004536	0	0.0384	0	0	0	0.7154	0	0	0	0	0	0	0	0	0	0	0
1	9	50630000	0.181	0.181	0	132700	239700	0	8.635	0	1.001	1967	0	0.3019	929.4	0	0.08228	16490	0	0.8437	0.5453	0	7.151e-05	117.5	0	0.01426	3.103	0	0.0313	0	0	0	0.7307	0	0	0	0	0	0	0	0	0	0	0
1	10	51990000	0.446	0.4456	0	520300	206900	0	41.96	0	1	7931	0	0.3062	3806	0	0.08061	7699	0	0.9135	0.7051	0	7.326e-05	369.1	0	0.01453	542.7	0	0.02684	2.608	0	0.0501635	0.6441	0	0	0	0	0	0	0	0	0	0	0
1	11	53970000	1.45	1.45	0	787000	155100	0	178	0	1	14870	0	0.5323	7510	0	0.1866	43460	0	1.213	1.689	0	8.744e-05	732.6	0	0.02642	1821	0	0.04205	5.051	0	0.093589	0.5421	0	0	0	0	0	0	0	0	0	0	0
1	12	57000000	0.997	0.9969	0	702300	103500	0	109.6	0	1	4538	0	0.5463	2858	0	0.1905	40150	0	1.598	0.2433	0	7.905e-05	152.9	0	0.02561	626.9	0	0.04589	0.3147	0	0.00552105	0.5633	0	0	0	0	0	0	0	0	0	0	0
1	2009	57000000	0.742	0.7422	0.02437	4551000	3010000	0	947.7	0.7686	1	55660	243.8	0.343	31460	94.52	0.1151	188000	833.9	0.8747	7.92	0.02814	5.743e-05	2498	9.511	0.01508	10820	57.02	0.04704	9.896	26.62	0.173614	0.5633	0	0	0	0	0	0	0	0	0	0	0
1	1	59360000	0.872	0.8721	0	142300	115200	0	91.25	0	1	4206	0	0.5042	3044	0	0.1719	21040	0	1.852	0.191	0	6.696e-05	113.7	0	0.02267	620.5	0	0.04088	0.4408	0	0.00742588	0.5757	0	0	0	0	0	0	0	0	0	0	0
1	2	62960000	1.59	1.587	0	193600	288500	0	170	0	1.037	3358	0	0.4801	2346	0	0.165	20800	0	1.908	0.1012	0	5.796e-05	77.27	0	0.02034	2236	0	0.05164	0.5908	0	0.00938374	0.5729	0	0	0	0	0	0	0	0	0	0	0
1	3	64990000	2.07	2.071	1.284	270800	350800	0	293	3.44	1	5319	1524	0.4433	4287	604.8	0.1748	42470	7042	2.009	0.2365	0.1593	4.658e-05	158.4	60.75	0.01769	2472	227.1	0.06563	0.8838	139.2	0.013599	0.5637	0	0	0	0	0	0	0	0	0	0	0
1	4	64990000	0.871	0.8712	0.5787	151700	369800	0	82.38	1.5	1	2733	595.3	0.3985	1350	211	0.1418	6504	2673	1.795	0.1909	0.06031	4.047e-05	80.46	23.03	0.01543	933.1	100.3	0.06731	0.04064	54.02	0.000625327	0.5957	0	0	0	0	0	0	0	0	0	0	0
1	5	64990000	1.83	1.834	1.706	227500	290500	0	245.2	4.571	1	3945	1739	0.3756	2096	598.8	0.128	20560	7772	1.692	0.2549	0.1636	3.535e-05	127.8	65.87	0.01419	2570	317.1	0.07078	0.8913	160.3	0.0137144	0.6001	0	0	0	0	0	0	0	0	0	0	0
1	6	62680000	0.455	0.4545	0.006667	0	467600	0	32.2	0.01728	1	2114	6.122	0.3485	955.9	1.973	0.1076	1148	27.58	1.512	0.5454	0.0005825	3.53e-05	94.25	0.2293	0.01315	173.8	1.311	0.06834	0	0.5821	0	0.6366	0	0	0	0	0	0	0	0	0	0	0
1	7	62820000	0.331	0.331	0	0	474900	0	20.89	0	1	2002	0	0.3292	937.4	0	0.09332	337.3	0	1.308	0.6133	0	3.874e-05	107.8	0	0.01274	0.004529	0	0.05214	0	0	0	0.6867	0	0	0	0	0	0	0	0	0	0	0
1	8	56090000	0.308	0.3078	0	0	635800	0	19.6	0	1.001	1997	0	0.3248	933.2	0	0.08582	601.9	0	1.175	0.6055	0	4.469e-05	104.9	0	0.01305	0.004516	0	0.04037	0	0	0	0.7061	0	0	0	0	0	0	0	0	0	0	0
1	9	50830000	0.287	0.2865	0	0	397000	0	16.58	0	1.001	1962	0	0.3377	906.6	0	0.0844	419.4	0	1.109	0.41	0	5.046e-05	92.06	0	0.01389	0.004395	0	0.03278	0	0	0	0.7236	0	0	0	0	0	0	0	0	0	0	0
1	10	51480000	0.374	0.3735	0	0	198400	0	25.6	0	1	2099	0	0.3321	932.2	0	0.07936	735.6	0	0.9821	0.3364	0	5.113e-05	74.69	0	0.01365	241.2	0	0.02709	0	0	0	0.7561	0	0	0	0	0	0	0	0	0	0	0
1	11	50050000	0.411	0.4107	0	20450	107300	0	28.48	0	1	2096	0	0.319	907.3	0	0.07363	1101	0	0.8483	0.1338	0	4.691e-05	59.33	0	0.01274	430.5	0	0.02563	0	0	0	0.7621	0	0	0	0	0	0	0	0	0	0	0
1	12	52210000	0.875	0.8753	0	182400	118700	0	90.92	0	1	6236	0	0.3445	3612	0	0.09444	25710	0	0.9784	0.1556	0	4.164e-05	185.6	0	0.01296	1292	0	0.03331	2.664	0	0.0510247	0.6591	0	0	0	0	0	0	0	0	0	0	0
1	2010	52210000	0.85	0.8497	0.3021	1189000	3815000	0	1116	9.528	1	38070	3864	0.3763	22310	1417	0.116	141400	17510	1.423	3.775	0.3838	4.613e-05	1276	149.9	0.01513	10970	645.8	0.04781	5.511	354	0.105554	0.6591	0	0	0	0	0	0	0	0	0	0	0
1	1	54630000	0.655	0.6547	0	779500	111700	0	57.6	0	1	2806	0	0.3468	1547	0	0.09947	2935	0	1	0.1521	0	3.564e-05	69.83	0	0.01228	986.7	0	0.04119	0.1149	0	0.00210324	0.6664	0	0	0	0	0	0	0	0	0	0	0
1	2	58610000	1.31	1.312	0	1050000	136000	0	129.8	0	1.037	4769	0	0.362	3420	0	0.1222	17390	0	1.001	0.6532	0	3.72e-05	195.4	0	0.01297	1391	0	0.04904	0.3603	0	0.00614742	0.627	0	0	0	0	0	0	0	0	0	0	0
1	3	62350000	1.32	1.322	0	389900	192600	0	154.9	0	1	5163	0	0.3533	4003	0	0.1372	25050	0	1.133	0.335	0	3.541e-05	158.8	0	0.01252	1591	0	0.05364	0.822	0	0.0131836	0.6011	0	0	0	0	0	0	0	0	0	0	0
1	4	64990000	1.76	1.764	0.7499	946100	389700	0	231.8	1.944	1	6816	709.7	0.346	4579	293.2	0.1341	28130	2363	1.154	0.8133	0.07324	3.478e-05	302.5	26.19	0.01232	2187	128.2	0.0619	1.588	72.36	0.0244345	0.5686	0	0	0	0	0	0	0	0	0	0	0
1	5	64990000	1.41	1.411	1.266	336600	444500	0	166	3.392	1	2805	1204	0.3511	1265	480.9	0.1382	23100	4728	1.398	0.2953	0.1244	3.624e-05	92.31	44.75	0.01302	1901	234	0.06949	0.02814	123.6	0.00043299	0.5953	0	0	0	0	0	0	0	0	0	0	0
1	6	64510000	1.11	1.108	0.004127	38690	383000	0	112.2	0.0107	1	2070	3.58	0.3254	907.2	1.319	0.1137	4846	14.58	1.301	0.5253	0.0003767	3.633e-05	81.58	0.1323	0.01206	2031	0.7681	0.07628	0	0.3676	0	0.607	0	0	0	0	0	0	0	0	0	0	0
1	7	64780000	0.416	0.4157	0	0	558600	0	28.85	0	1	2119	0	0.3059	977.6	0	0.09672	863.7	0	1.139	0.8308	0	4.124e-05	108.5	0	0.01158	268.3	0	0.07086	0	0	0	0.6521	0	0	0	0	0	0	0	0	0	0	0
1	8	58360000	0.284	0.2837	0	0	269400	0	16.64	0	1.001	2000	0	0.3017	942.6	0	0.08777	575.7	0	1.02	0.6298	0	4.704e-05	111	0	0.01194	0.004509	0	0.05605	0	0	0	0.6764	0	0	0	0	0	0	0	0	0	0	0
1	9	53100000	0.261	0.2607	0	18600	348800	0	14.89	0	1.001	1973	0	0.3137	907	0	0.08525	419.8	0	0.9599	0.3947	0	5.201e-05	93.07	0	0.01278	0.00437	0	0.04541	0	0	0	0.6986	0	0	0	0	0	0	0	0	0	0	0
1	10	54570000	0.615	0.6145	0	206400	222600	0	51.87	0	1	3420	0	0.3095	1501	0	0.07958	13880	0	0.8696	0.512	0	5.099e-05	149.6	0	0.0126	930.4	0	0.04174	0	0	0	0.6933	0	0	0	0	0	0	0	0	0	0	0
1	11	54390000	0.765	0.7646	0	379900	145200	0	68.26	0	1	4448	0	0.3334	2059	0	0.08957	12920	0	1.073	0.8429	0	5.82e-05	202	0	0.01416	1195	0	0.04739	0.008865	0	0.00016299	0.662	0	0	0	0	0	0	0	0	0	0	0
1	12	55780000	0.555	0.5546	0	294200	137300	0	43.75	0	1	2612	0	0.3342	1199	0	0.08852	5526	0	0.9913	0.2286	0	5.405e-05	74.45	0	0.01379	823.6	0	0.04971	0	0	0	0.6811	0	0	0	0	0	0	0	0	0	0	0
1	2011	55780000	0.864	0.8637	0.1695	4440000	3339000	0	1077	5.346	1	41000	1918	0.3307	23310	775.5	0.1056	135600	7106	1.084	6.213	0.198	4.319e-05	1639	71.08	0.01263	13310	363	0.05511	2.922	196.3	0.0523844	0.6811	0	0	0	0	0	0	0	0	0	0	0
1	1	58640000	0.793	0.7929	0	880300	144900	0	74.2	0	1	3486	0	0.3224	2022	0	0.08863	6709	0	0.9234	0.2452	0	4.844e-05	108	0	0.01284	882.9	0	0.04767	0.0007723	0	1.31702e-05	0.6799	0	0	0	0	0	0	0	0	0	0	0
1	2	63160000	1.49	1.486	0	995400	200600	0	166.4	0	1	5673	0	0.3283	4336	0	0.1108	49160	0	1.134	0.3085	0	4.26e-05	189.7	0	0.01258	1670	0	0.0512	0.5934	0	0.00939519	0.6203	0	0	0	0	0	0	0	0	0	0	0
1	3	64990000	2.77	2.766	2.466	1228000	196900	0	427.7	6.606	1	7702	2187	0.3297	6427	887	0.1298	47680	10300	1.525	0.3849	0.2339	3.632e-05	250.6	79.22	0.01204	3093	447.7	0.06497	2.857	232.9	0.0439606	0.5572	0	0	0	0	0	0	0	0	0	0	0
1	4	64990000	1.37	1.373	1.105	101400	255000	0	152.5	2.865	1	2551	967.2	0.3357	1177	420.3	0.1447	16310	4867	1.692	0.2847	0.09749	3.385e-05	77.56	34.71	0.01203	1966	218.9	0.07664	0.005037	109	7.75042e-05	0.5831	0	0	0	0	0	0	0	0	0	0	0
1	5	64990000	0.876	0.8762	0.6676	140300	420100	0	84.35	1.788	1	2357	553.7	0.3074	1066	213.1	0.117	9071	2763	1.528	0.3493	0.05681	3.17e-05	84.77	19.65	0.01091	1023	132.4	0.07321	0	60.98	0	0.6195	0	0	0	0	0	0	0	0	0	0	0
1	6	62680000	0.41	0.4098	0.003333	0	368000	0	27.29	0.008641	1	2036	2.554	0.293	929.2	0.913	0.09979	2541	12.3	1.358	0.9947	0.0002722	3.607e-05	100.9	0.09087	0.01061	1009	0.5996	0.06822	0	0.2734	0	0.6386	0	0	0	0	0	0	0	0	0	0	0
1	7	62710000	0.271	0.2707	0	0	417700	0	16.06	0	1	1994	0	0.2813	943.6	0	0.08754	330.6	0	1.186	0.8653	0	4.465e-05	127.1	0	0.01078	0.003656	0	0.05703	0	0	0	0.6881	0	0	0	0	0	0	0	0	0	0	0
1	8	56070000	0.24	0.2398	0	0	366200	0	13.34	0	1.001	1947	0	0.281	933.5	0	0.08121	552.1	0	1.063	0.9638	0	5.52e-05	126.9	0	0.01163	0.00455	0	0.04406	0	0	0	0.7076	0	0	0	0	0	0	0	0	0	0	0
1	9	50640000	0.223	0.2234	0	0	402300	0	11.7	0	1.001	1932	0	0.2968	905.6	0	0.08087	370.4	0	1.006	0.6663	0	6.589e-05	107.1	0	0.01292	0.004429	0	0.03589	0	0	0	0.7242	0	0	0	0	0	0	0	0	0	0	0
1	10	51880000	0.514	0.5138	0	234300	207200	0	40.4	0	1	2924	0	0.2974	1362	0	0.07757	4956	0	0.9058	0.7046	0	6.953e-05	145.1	0	0.01317	453.9	0	0.03088	0	0	0	0.73	0	0	0	0	0	0	0	0	0	0	0
1	11	52440000	0.881	0.8806	0	844000	174600	0	107.4	0	1	11650	0	0.3824	6544	0	0.1261	8939	0	0.883	1.346	0	7.451e-05	521.2	0	0.01711	1200	0	0.03686	3.076	0	0.0586575	0.5839	0	0	0	0	0	0	0	0	0	0	0
1	12	55690000	1.11	1.11	0	666300	138400	0	135.1	0	1	7897	0	0.4632	5998	0	0.1768	46280	0	1.106	0.5224	0	7.623e-05	280.3	0	0.02036	774.1	0	0.0401	1.728	0	0.0310289	0.5463	0	0	0	0	0	0	0	0	0	0	0
1	2012	55690000	0.911	0.9107	0.3563	5090000	3292000	0	1256	11.27	1	52150	3711	0.3265	32640	1521	0.11	192900	17940	1.192	7.636	0.3885	5.128e-05	2119	133.7	0.01308	12070	799.7	0.05221	8.26	403.2	0.148321	0.5463	0	0	0	0	0	0	0	0	0	0	0
1	1	62980000	2.26	2.26	0	1323000	82440	0	328.8	0	1	9491	0	0.4684	9257	0	0.1993	53720	0	1.657	0.2186	0	6.45e-05	234.5	0	0.0191	2573	0	0.05078	3.176	0	0.0504287	0.4914	0	0	0	0	0	0	0	0	0	0	0
1	2	64990000	3.5	3.495	2.794	455800	81210	0	500.5	6.518	1.037	3769	3064	0.4897	2596	1590	0.2547	66060	15480	2.422	0.1344	0.3277	5.248e-05	86.63	111.5	0.01784	2906	461.2	0.07297	0.2798	322.1	0.00430528	0.5181	0	0	0	0	0	0	0	0	0	0	0
1	3	64990000	1.14	1.136	1.13	257900	275100	0	120.2	3.026	1	2447	1230	0.4054	1109	559.3	0.1837	4660	6262	2.06	0.1458	0.1257	4.137e-05	60.16	43.41	0.01429	1718	234.6	0.0775	0	130.2	0	0.5546	0	0	0	0	0	0	0	0	0	0	0
1	4	64990000	0.919	0.9188	0.7252	266400	228100	0	87.14	1.88	1	2940	700.4	0.3711	1478	284.3	0.1497	5826	3338	1.76	0.4874	0.07345	3.925e-05	116	24.76	0.01314	958.7	135.9	0.07178	0.02562	71.63	0.000394214	0.5877	0	0	0	0	0	0	0	0	0	0	0
1	5	64990000	0.887	0.8872	0.7604	392500	453000	0	86.46	2.037	1	2760	701.3	0.3426	1291	255.2	0.1238	8636	3166	1.545	0.2814	0.07496	3.663e-05	101.7	24.88	0.01215	835.3	129.1	0.06287	0.04611	68.22	0.000709494	0.6239	0	0	0	0	0	0	0	0	0	0	0
1	6	63110000	0.561	0.5612	0.003333	0	329100	0	43.83	0.008641	1	2062	2.841	0.323	917.3	0.9698	0.1051	1689	12.57	1.376	0.5369	0.0003037	3.633e-05	84.38	0.1006	0.0115	339.3	0.5063	0.05388	0	0.2684	0	0.6579	0	0	0	0	0	0	0	0	0	0	0
1	7	63140000	0.305	0.3052	0	0	508800	0	18.88	0	1	2049	0	0.3075	956.1	0	0.09147	457.1	0	1.195	0.5569	0	3.971e-05	111.9	0	0.01136	0	0	0.04242	0	0	0	0.7066	0	0	0	0	0	0	0	0	0	0	0
1	8	56570000	0.276	0.2759	0	0	389200	0	15.96	0	1.001	1988	0	0.3042	933.7	0	0.08405	836.4	0	1.072	0.593	0	4.438e-05	107.9	0	0.01179	0	0	0.03272	0	0	0	0.7249	0	0	0	0	0	0	0	0	0	0	0
1	9	51370000	0.258	0.2578	0	0	265800	0	14.71	0	1.001	1982	0	0.318	907.1	0	0.08281	418	0	1.013	0.421	0	5.013e-05	93.28	0	0.01273	0	0	0.02656	0	0	0	0.7409	0	0	0	0	0	0	0	0	0	0	0
1	10	52500000	0.528	0.5279	0	20470	142400	0	41.55	0	1	2140	0	0.3133	940.1	0	0.07769	1840	0	0.9086	0.2902	0	4.983e-05	74.77	0	0.01256	436.4	0	0.02388	0	0	0	0.7639	0	0	0	0	0	0	0	0	0	0	0
1	11	52890000	0.833	0.8325	0	751500	126200	0	82.36	0	1	9547	0	0.3602	5248	0	0.1067	6242	0	0.8169	0.9561	0	5.292e-05	374.2	0	0.01429	804.6	0	0.0273	1.953	0	0.0369257	0.6266	0	0	0	0	0	0	0	0	0	0	0
1	12	56050000	0.868	0.8684	0	1146000	59520	0	85.82	0	1	5769	0	0.4274	3585	0	0.1489	11830	0	0.824	0.5296	0	5.534e-05	206.6	0	0.01677	703.6	0	0.03145	0.3594	0	0.00641213	0.6136	0	0	0	0	0	0	0	0	0	0	0
1	2013	56050000	1	1.002	0.4271	4614000	2941000	0	1426	13.47	1	46940	5699	0.3672	29220	2690	0.1325	162200	28260	1.374	5.151	0.6021	4.674e-05	1652	204.6	0.01389	11270	961.3	0.04747	5.84	592.4	0.104193	0.6136	0	0	0	0	0	0	0	0	0	0	0
			0.884
