# Supplementary material for: A quantitative approach on environment-food nexus: integrated modeling and indices for cumulative impact assessment of farm management practices
Source: PeerJ. 2023 Jan 30;11:e14816. doi: 10.7717/peerj.14816 (PMC9893910; doi:10.7717/peerj.14816)
Supplement: Supplemental Information 3 [file peerj-11-14816-s003.xlsx]

## Sheet: Sheet1
senario	TIME	Marine eutrophication	LOG Marine eutrophication	Freshwater eutrophication	LOG Freshwater eutrophication	Water use -aquatic ecosystems	LOG Water consumption -aquatic ecosystems	Water use - human health	LOG Water consumption - human health	Water use -Terrestrial ecosystem	LOG Water consumption - Land	Ecosystem	Health	Entropy	EPI	EPI (no use)	Total Impact	Removal
Base	2013	2.38772e-07	-6.62202	6.97858e-07	-6.15623	1.14605e-07	-6.9408	2.64611e-07	-6.57739	3.67925e-07	-6.43424	1.41916e-06	2.64611e-07	7.74443e-07	9.91977e-07	3.65943e-06
BMP1	2013	2.09945e-07	-6.67789	6.92789e-07	-6.1594	1.05273e-07	-6.97769	2.43064e-07	-6.61428	3.38438e-07	-6.47052	1.34644e-06	2.43064e-07	7.12315e-07	9.38194e-07	2.95806e-06		8.02225	5.42186	19.1661
BMP2	2013	1.7921e-07	-6.74664	6.75668e-07	-6.17027	9.70967e-08	-7.0128	2.24186e-07	-6.64939	3.12605e-07	-6.505	1.26458e-06	2.24186e-07	6.66798e-07	8.79634e-07	2.75459e-06		13.8997	11.3252	24.7263
Base	Avg	1.89559e-07	-6.7331	7.52129e-07	-6.12972	1.11631e-07	-6.9524	2.57744e-07	-6.58899	3.58528e-07	-6.44565	1.41185e-06	2.57744e-07	7.67378e-07	9.84829e-07	3.80853e-06
BMP1	Avg	1.68627e-07	-6.78491	7.29299e-07	-6.14142	1.03824e-07	-6.98383	2.39719e-07	-6.62043	3.33861e-07	-6.47656	1.33561e-06	2.39719e-07	7.05785e-07	9.30131e-07	3.06608e-06		8.02644	5.55407	19.4942
BMP2	Avg	1.51588e-07	-6.82754	7.19897e-07	-6.14756	9.62459e-08	-7.01668	2.22222e-07	-6.65328	3.09917e-07	-6.50882	1.27765e-06	2.22222e-07	6.71228e-07	8.8714e-07	2.8716e-06		12.5296	9.91936	24.6008
		Base-Ecosystem	Base-Health	BMP1-Ecosystem	BMP1-Health	BMP2-Ecosystem	BMP2-Health	Base	Base	BMP1	BMP1	BMP2	BMP2	BMP0 - Food	BMP1 - Food	BMP2 - Food	Food
	2007	1.42847e-06	2.50097e-07	1.33216e-06	2.33931e-07	1.29605e-06	2.18087e-07	2067.28	41.4546	1229.17	40.8005	719.706	38.3023	-1.25781e-06	-1.237e-06	-1.21084e-06
	2008	1.27442e-06	2.42862e-07	1.21596e-06	2.28696e-07	1.1625e-06	2.14332e-07	1176.1	19.7881	584.432	19.5337	257.173	16.4521	0.610089	0.570564	0.554348
	2009	1.35621e-06	2.65664e-07	1.29927e-06	2.45695e-07	1.2422e-06	2.25442e-07	3984.84	74.0353	2678.31	68.931	1625.63	62.7419	0.782969	0.751927	0.732663
	2010	1.38964e-06	2.60199e-07	1.33527e-06	2.44026e-07	1.27955e-06	2.25372e-07	3311.65	35.0431	2472.73	33.5658	1616.99	33.3347
	2011	1.38335e-06	2.57796e-07	1.31823e-06	2.40522e-07	1.2524e-06	2.22031e-07	3015.73	48.0138	2041.11	49.1563	1205.44	42.6591		6.4786	9.13661
	2012	1.35669e-06	2.63744e-07	1.28994e-06	2.45509e-07	1.20499e-06	2.25212e-07	3748.35	60.7587	2655.36	70.4707	1597.31	50.5582	Nutrition production	3.96463	6.42506
	2013	1.41916e-06	2.64611e-07	1.34644e-06	2.43064e-07	1.26458e-06	2.24186e-07	3855.17	82.0053	2354.17	50.9694	1470.97	41.5716
		1.37256e-06	2.57853e-07	1.30532e-06	2.40206e-07	1.24318e-06	2.22095e-07	3022.73	51.5856	2002.18	47.6325	1213.32	40.8028
2013
				4.89884	6.84392	9.42618	13.8678					33.7625	59.8602
												7.66318	20.9026
Avg
												KgP

## Sheet: Sheet2
senario	TIME	Marine eutrophication		Freshwater eutrophication		Water use -aquatic ecosystems		Water use - human health		Water use -Terrestrial ecosystem		Ecosystem (agg.)	Health (agg.)	Entropy	EPI			Removal
Base	2013	2.38772e-07		6.97858e-07		1.14605e-07		2.64611e-07		3.67925e-07		1.41916e-06	2.64611e-07	7.74443e-07	9.91977e-07
BMP1	2013	2.09945e-07		6.92789e-07		1.05273e-07		2.43064e-07		3.38438e-07		1.34644e-06	2.43064e-07	7.12315e-07	9.38194e-07			8.02225	5.42186	19.1661
BMP2	2013	1.7921e-07		6.75668e-07		9.70967e-08		2.24186e-07		3.12605e-07		1.26458e-06	2.24186e-07	6.66798e-07	8.79634e-07			13.8997	11.3252	24.7263
Base	Avg	1.89559e-07		7.52129e-07		1.11631e-07		2.57744e-07		3.58528e-07		1.41185e-06	2.57744e-07	7.67378e-07	9.84829e-07
BMP1	Avg	1.68627e-07		7.29299e-07		1.03824e-07		2.39719e-07		3.33861e-07		1.33561e-06	2.39719e-07	7.05785e-07	9.30131e-07			8.02644	5.55407	19.4942
BMP2	Avg	1.51588e-07		7.19897e-07		9.62459e-08		2.22222e-07		3.09917e-07		1.27765e-06	2.22222e-07	6.71228e-07	8.8714e-07			12.5296	9.91936	24.6008
		Base-Ecosystem	Base-Health	BMP1-Ecosystem	BMP1-Health	BMP2-Ecosystem	BMP2-Health	Base	Base	BMP1	BMP1	BMP2	BMP2
	2007	1.42847e-06	2.50097e-07	1.33216e-06	2.33931e-07	1.29605e-06	2.18087e-07	2067.28	41.4546	1229.17	40.8005	719.706	38.3023	BMP0 - Food	BMP1 - Food	BMP2 - Food
	2008	1.27442e-06	2.42862e-07	1.21596e-06	2.28696e-07	1.1625e-06	2.14332e-07	1176.1	19.7881	584.432	19.5337	257.173	16.4521	0.610089	0.570564	0.554348
	2009	1.35621e-06	2.65664e-07	1.29927e-06	2.45695e-07	1.2422e-06	2.25442e-07	3984.84	74.0353	2678.31	68.931	1625.63	62.7419	0.782969	0.751927	0.732663
	2010	1.38964e-06	2.60199e-07	1.33527e-06	2.44026e-07	1.27955e-06	2.25372e-07	3311.65	35.0431	2472.73	33.5658	1616.99	33.3347
	2011	1.38335e-06	2.57796e-07	1.31823e-06	2.40522e-07	1.2524e-06	2.22031e-07	3015.73	48.0138	2041.11	49.1563	1205.44	42.6591		6.4786	9.13661
	2012	1.35669e-06	2.63744e-07	1.28994e-06	2.45509e-07	1.20499e-06	2.25212e-07	3748.35	60.7587	2655.36	70.4707	1597.31	50.5582	Nutrition production	3.96463	6.42506
	2013	1.41916e-06	2.64611e-07	1.34644e-06	2.43064e-07	1.26458e-06	2.24186e-07	3855.17	82.0053	2354.17	50.9694	1470.97	41.5716
		1.37256e-06	2.57853e-07	1.30532e-06	2.40206e-07	1.24318e-06	2.22095e-07	3022.73	51.5856	2002.18	47.6325	1213.32	40.8028
%				4.89884	6.84392	9.42618	13.8678					33.7625	59.8602
												7.66318	20.9026
