# Supplementary material for: A quantitative approach on environment-food nexus: integrated modeling and indices for cumulative impact assessment of farm management practices
Source: PeerJ. 2023 Jan 30;11:e14816. doi: 10.7717/peerj.14816 (PMC9893910; doi:10.7717/peerj.14816)
Supplement: Supplemental Information 4 [file peerj-11-14816-s004.xlsx]

## Sheet: Final normalization scores
	Midpoint					Endpoint
	unit	World				unit	World
Human health		Individualistic	Hierarchic	Egalitarian			Individualistic	Hierarchic	Egalitarian
Global Warming - Human health	kg CO2 eq. per person in 2010	10757.1	7990.41	5797.6		DALY per person in 2010	0.000873473	0.0074151	0.0724701
Stratospheric ozone depletion - Human health	kg CFC11 eq. per person in 2010	0.0653294	0.06001	0.0704373		DALY per person in 2010	1.54831e-05	3.18653e-05	9.4386e-05
Ionzing Radiation - Human health	kBq Co-60 emitted to air eq. per person in 2010	469.716	479.917	698.581		DALY per person in 2010	3.19407e-06	4.0793e-06	9.78013e-06
Fine particulate matter formation - Human health	kg PM2.5 eq. per person in 2010	16.0201	25.5696	25.5696		DALY per person in 2010	0.0100092	0.0160948	0.0160948
Photochemical ozone formation - Human health	kg NOx eq. per person in 2010	20.5675	20.5675	20.5675		DALY per person in 2010	1.80227e-05	1.80227e-05	1.80227e-05
Toxicity - Human health (cancer)	kg 1,4-DCB emitted to urban air eq. per person in 2010	0.990335	10.2983	295.234		DALY per person in 2010	3.28791e-06	3.41904e-05	0.000980177
Toxicity - Human health (non-cancer)	kg 1,4-DCB emitted to urban air eq. per person in 2010	50.9497	31251.8	2.22435e+06		DALY per person in 2010	3.38816e-07	0.000207825	0.0147919
Water consumption - human health	m3 consumed per person in 2010	266.639	266.639	266.639		DALY per person in 2010	0.000196028	0.000196028	0.000290668
Terrestrial ecosystems
Global Warming - Terrestrial ecosystems	kg CO2 eq. per person in 2010	10757.1	7990.41	5797.6		Species.year per person in 2010	5.72276e-06	2.23731e-05	0.00014494
Photochemical ozone formation - Terrestrial ecosystems	kg NOx eq. per person in 2010	17.7493	17.7493	17.7493		Species.year per person in 2010	2.23876e-06	2.23876e-06	2.23876e-06
Acidification - Terrestrial ecosystems	kg SO2 eq. per person in 2010	40.9805	40.9805	40.9805		Species.year per person in 2010	8.41989e-06	8.41989e-06	8.41989e-06
Toxicity - Terrestrial ecosystems	kg 1,4-DBC emitted to industrial soil eq. per person in 2010	6727.9	15200.3	16364		Species.year per person in 2010	0.00036242	0.000818814	0.000881502
Water consumption - terrestrial ecosystems	m3 consumed per person in 2010	266.639	266.639	266.639		Species.year per person in 2010	0	3.48437e-06	3.48437e-06
Land use - occupation	m2∙annual crop eq per person in 2010	6167.48	6167.48	6167.48		Species.year per person in 2010	0.000623363	0.000623363	0.000623363
Freshwater ecosystems
Global Warming - Freshwater ecosystems	kg CO2 eq. per person in 2010	10757.1	7990.41	5797.6		Species.year per person in 2010	1.55977e-10	6.11266e-10	3.95397e-09
Eutrophication - Freshwater ecosystems	kg P to freshwater eq. per person in 2010	0.649888	0.649888	0.649888		Species.year per person in 2010	4.89635e-07	4.89635e-07	4.89635e-07
Toxicity - Freshwater ecosystems	kg 1,4-DBC emitted to freshwater eq. per person in 2010	12.5705	25.1747	290.347		Species.year per person in 2010	8.73652e-09	1.74964e-08	2.01791e-07
Water consumption -aquatic ecosystems	m3 consumed per person in 2010	266.639	266.639	266.639		Species.year per person in 2010	6.15711e-10	6.15711e-10	6.15711e-10
Marine ecosystems
Toxicity - Marine ecosystems	kg 1,4-DBC emitted to sea water eq. per person in 2010	8.7974	43.4428	2.4631e+06		Species.year per person in 2010	9.23727e-10	4.5615e-09	0.000258626
Eutrophication - marine ecosystems	kg N to marine water equivalents per person in 2010	4.61779	4.61779	4.61779		Species.year per person in 2011	6.12344e-09	6.12344e-09	6.12344e-09
Resources
Mineral resource scarcity	kg Cu-eq per person in 2010	193174	120051	120051		USD2013 per person in 2010	30799.4	27742	27742
Fossil resource scarcity						USD2013 per person in 2010	291.352	291.352	291.352
Crude oil	oil-eq per person in 2010	569.905	569.905	569.905
Natural gas	oil-eq per person in 2010	0.401979	0.401979	0.401979
Hard coal	oil-eq per person in 2010	381.514	381.514	381.514
Brown coal	oil-eq per person in 2010	31.4564	31.4564	31.4564
Peat	oil-eq per person in 2010
World population
6895889018
