# Supplementary material for: A quantitative approach on environment-food nexus: integrated modeling and indices for cumulative impact assessment of farm management practices
Source: PeerJ. 2023 Jan 30;11:e14816. doi: 10.7717/peerj.14816 (PMC9893910; doi:10.7717/peerj.14816)
Supplement: Supplemental Information 5 [file peerj-11-14816-s005.xlsx]

## Sheet: Version
		Date sheet
	ReCiPe 2016 v1.1	2017-05-01
	ReCiPe team
	name	affiliation	e-mail
	Mark Huijbregts	Radboud University Nijmegen, Netherlands	M.Huijbregts@science.ru.nl
	Rosalie van Zelm	Radboud University Nijmegen, Netherlands	R.vanZelm@science.ru.nl
	Zoran Steinmann	Radboud University Nijmegen, Netherlands	Z.Steinmann@science.ru.nl
	Gea Stam	RIVM, Bilthoven, Netherlands	gea.stam@rivm.nl
	Pieter Elshout	Radboud University Nijmegen, Netherlands	p.elshout@science.ru.nl
	Marisa Vieira	Pre Consultants, Netherlands	vieira@pre.nl
	Michiel Zijp	RIVM, Bilthoven, Netherlands	michiel.zijp@rivm.nl
	Anne Hollander	RIVM, Bilthoven, Netherlands	anne.hollander@rivm.nl
	Report
	Update 2016	Huijbregts MAJ, Steinmann ZJN, Elshout PMF, Stam G, Verones F, Vieira M, Van Zelm R, 2016. ReCiPe2016. A harmonized life cycle impact assessment method at midpoint and endpoint level. Report I: Characterization. Department of Environmental Science, Radboud University Nijmegen
	March 2017
	Corrected unit of land occupation and transformation mid- to endpoint factor
	Added land transformation sheet
	July 2017	v1.1
	Value choices PM changed: all secondary inorganic aerosols now included in Hierarchist perspective
	Freshwater eutrophication mid- to endpoint adapted based on 2015 population densities
	Marine eutrophication added
	Terrestrial ecotoxicity factors changed because of exclusion effects on urban soil
	Human non-carcinogenic toxicity factors changed due to model error found
	January 2018
	Factor added for several toxic chemicals for human toxicity carcinogenic individualist perspective

## Sheet: Midpoint to endpoint factors
Midpoint to endpoint conversion factor	unit	Individualistic	Hierarchic	Egalitarian
Human health
Global Warming - Human health	DALY/kg CO2 eq.	8.12e-08	9.28e-07	1.25e-05
Stratospheric ozone depletion - Human health	DALY/kg CFC11 eq.	0.000237	0.000531	0.00134
Ionzing Radiation - Human health	DALY/kBq Co-60 emitted to air eq.	6.8e-09	8.5e-09	1.4e-08
Fine particulate matter formation - Human health	DALY/kg PM2.5 eq.	0.000629	0.000629	0.000629
Photochemical ozone formation - Human health	DALY/kg NOx eq.	9.1e-07	9.1e-07	9.1e-07
Toxicity - Human health (cancer)	DALY/kg 1,4-DCB emitted to urban air eq.	3.32e-06	3.32e-06	3.32e-06
Toxicity - Human health (non-cancer)	DALY/kg 1,4-DCB emitted to urban air eq.	2.28e-07	2.28e-07	2.28e-07
Water consumption - human health	Daly/m3 consumed	3.1e-06	2.22e-06	2.22e-06
Terrestrial ecosystems
Global Warming - Terrestrial ecosystems	Species.year/kg CO2 eq.	5.32e-10	2.8e-09	2.5e-08
Photochemical ozone formation - Terrestrial ecosystems	Species.year/kg NOx eq.	1.29e-07	1.29e-07	1.29e-07
Acidification - Terrestrial ecosystems	Species.year/kg SO2 eq.	2.12e-07	2.12e-07	2.12e-07
Toxicity - Terrestrial ecosystems	species*yr/kg 1,4-DBC emitted to industrial soil eq.	1.14e-11	1.14e-11	1.14e-11
Water consumption - terrestrial ecosystems	species.yr/m3 consumed	0	1.35e-08	1.35e-08
Land use - occupation and transformation	Species/(m2∙annual crop eq)	8.88e-09	8.88e-09	8.88e-09
Freshwater ecosystems
Global Warming - Freshwater ecosystems	Species.year/kg CO2 eq.	1.45e-14	7.65e-14	6.82e-13
Eutrophication - Freshwater ecosystems	Species.year/kg P to freshwater eq.	6.71073e-07	6.71073e-07	6.71073e-07
Toxicity - Freshwater ecosystems	species∙yr/kg 1,4-DBC emitted to freshwater eq.	6.95e-10	6.95e-10	6.95e-10
Water consumption -aquatic ecosystems	species.yr/m3 consumed	6.04e-13	6.04e-13	6.04e-13
Marine ecosystems
Toxicity - Marine ecosystems	species∙yr/kg 1,4-DBC emitted to sea water eq.	1.05e-10	1.05e-10	1.05e-10
Eutrophication - Marine ecosystems	Species.year/kg N to marine water eq.	1.7e-09	1.7e-09	1.7e-09
Resources
Mineral resource scarcity	USD2013/kg Cu	0.159438	0.231084	0.231084
Fossil resource scarcity		Endpoint characterisation factors			Note: this category does not have 1 mid- to endpoint, but endpoint factors reported directly for each fossil
Crude oil	USD2013/kg	0.456568	0.456568	0.456568
Hard coal	USD2013/kg	0.0341359	0.0341359	0.0341359
Natural gas	USD2013/Nm3	0.301359	0.301359	0.301359
Brown coal	USD2013/kg	-	-	0.0341359
Peat	USD2013/kg	-	-	0.0341359

## Sheet: Global Warming
Global Warming			GWP20	GWP100	GWP1000
			(kg CO2eq/ kg GHG)	(kg CO2eq/ kg GHG)	(kg CO2eq/ kg GHG)
Name	Alternative name (=name in emission database if different)	Formula	Individualist	Hierarchist	Egalitarian
Carbon dioxide		CO2	1	1	1
Methane		CH4	84	34	4.76396
Fossil methane		CH4	85	36	4.89628
Nitrous oxide	dinitrogen oxide (nitrous oxide)	N2O	264	298	78.813
Chlorofluorocarbons
CFC-11		CCl3F	6900	5352	875.375
CFC-12		CCl2F2	10800	11547	2709.36
CFC-13		CClF3	10900	15451	12684.1
CFC-113		CCl2FCClF2	6490	6586	1409.5
CFC-114		CClF2CClF2	7710	9615	3492.27
CFC-115		CClF2CF3	5860	8516	8578.81
Hydrochlorofluorocarbons
HCFC-21		CHCl2F	543	179	24.6362
HCFC-22		CHClF2	5280	2106	295.86
HCFC-122		CHCl2CF2Cl	218	72	9.9092
HCFC-122a		CHFClCFCl2	945	312	43.2191
HCFC-123		CHCl2CF3	292	96	13.2853
HCFC-123a		CHClFCF2Cl	1350	447	61.8902
HCFC-124		CHClFCF3	1870	635	88.1694
HCFC-132c		CH2FCFCl2	1230	409	56.5682
HCFC-141b		CH3CCl2F	2550	938	130.903
HCFC-142b		CH3CClF2	5020	2345	332.49
HCFC-225ca		CHCl2CF2CF3	469	155	21.3516
HCFC-225cb		CHClFCF2CClF2	1860	633	87.7981
(E)-1-Chloro-3,3,3-trifluoroprop-1-ene		trans-CF3CH=CHCl	5	2	0.250011
Hydrofluorocarbons
HFC-23		CHF3	10800	13856	5664.53
HFC-32		CH2F2	2430	817	113.258
HFC-41		CH3F	427	141	19.5341
HFC-125		CHF2CF3	6090	3691	546.438
HFC-134		CHF2CHF2	3580	1337	186.432
HFC-134a		CH2FCF3	3710	1549	217.639
HFC-143		CH2FCHF2	1200	397	54.9288
HFC-143a		CH3CF3	6940	5508	913.324
HFC-152		CH2FCH2F	60	20	2.7556
HFC-152a		CH3CHF2	506	167	22.9937
HFC-161		CH3CH2F	13	4	0.607691
HFC-227ca		CF3CF2CHF2	5080	3077	455.494
HFC-227ea		CF3CHFCF3	5360	3860	607.482
HFC-236cb		CH2FCF2CF3	3480	1438	202.397
HFC-236ea		CHF2CHFCF3	4110	1596	223.525
HFC-236fa		CF3CH2CF3	6940	8998	3918.25
HFC-245ca		CH2FCF2CHF2	2510	863	119.737
HFC-245cb		CF3CF2CH3	6680	5298	879.881
HFC-245ea		CHF2CHFCHF2	863	285	39.3645
HFC-245eb		CH2FCHFCF3	1070	352	48.5807
HFC-245fa		CHF2CH2CF3	2920	1032	143.679
HFC-263fb		CH3CH2CF3	278	92	12.6465
HFC-272ca		CH3CF2CH3	530	175	24.0942
HFC-329p		CHF2CF2CF2CF3	4510	2742	407.06
HFC-365mfc		CH3CF2CH2CF3	2660	966	134.686
HFC-43-10mee		CF3CHFCHFCF2CF3	4310	1952	276.606
HFC-1132a		CH2=CF2	0	0	0.00706236
HFC-1141		CH2=CHF	0	0	0.00281034
(Z)-HFC-1225ye		CF3CF=CHF(Z)	1	0	0.0390528
(E)-HFC-1225ye		CF3CF=CHF(E)	0	0	0.0132305
(Z)-HFC-1234ze		CF3CH=CHF(Z)	1	0	0.0476299
HFC-1234yf		CF3CF=CH2	1	0	0.0587617
(E)-HFC-1234ze		trans-CF3CH=CHF	4	1	0.159496
(Z)-HFC-1336		CF3CH=CHCF3(Z)	6	2	0.281034
HFC-1243zf		CF3CH=CH2	1	0	0.0250011
HFC-1345zfc		C2F5CH=CH2	0	0	0.0209863
3,3,4,4,5,5,6,6,6-Nonafluorohex-1-ene		C4F9CH=CH2	1	0	0.0228112
3,3,4,4,5,5,6,6,7,7,8,8,8-Tridecafluorooct-1-ene		C6F13CH=CH2	0	0	0.0180483
3,3,4,4,5,5,6,6,7,7,8,8,9,9,10,10,10-Heptadecafluorodec-1-ene		C8F17CH=CH2	0	0	0.0155481
Chlorocarbons and hydrochlorocarbons
Methyl chloroform	1,1,1,-trichloroethane (methyl chloroform)	CH3CCl3	578	193	26.7974
Carbon tetrachloride	tetrachloromethane (carbon tetrachloride)	CCl4	3480	2019	296.005
Methyl chloride	methyl chloride (chloromethane)	CH3Cl	45	15	2.04389
Methylene chloride		CH2Cl2	33	11	1.49277
Chloroform		CHCl3	60	20	2.73735
1,2-Dichloroethane	1,2-dichloroethane (ethylene dichloride)	CH2ClCH2Cl	3	1	0.150372
Bromocarbons, hyrdobromocarbons and Halons
Methyl bromide		CH3Br	9	3	0.394178
Methylene bromide		CH2Br2	4	1	0.169898
Halon-1201		CHBrF2	1350	454	62.9003
Halon-1202		CBr2F2	848	280	38.7074
Halon-1211	H-1211	CBrClF2	4590	2070	293.341
Halon-1301	H-1301	CBrF3	7800	7154	1342.22
Halon-2301		CH2BrCF3	635	210	29.0565
Halon-2311/Halothane		CHBrClCF3	151	50	6.87987
Halon-2401		CHFBrCF3	674	223	30.6738
Halon-2402	H-2402	CBrF2CBrF2	3440	1734	248.011
Fully Fluorinated Species
Nitrogen trifluoride		NF3	12800	17885	12816.7
Sulphur hexafluoride	SF6	SF6	17500	26087	34368.5
(Trifluoromethyl)sulfur pentafluoride		SF5CF3	13500	19396	17724.5
Sulfuryl fluoride		SO2F2	6840	4732	731.88
PFC-14		CF4	4880	7349	11009.8
PFC-116		C2F6	8210	12340	17810.2
PFC-c216		c-C3F6	6850	10208	13315.3
PFC-218		C3F8	6640	9878	12611.8
PFC-318		c-C4F8	7110	10592	13921.4
PFC-31-10		C4F10	6870	10213	13018.1
Perfluorocyclopentene		c-C5F8	7	2	0.312058
PFC-41-12		n-C5F12	6350	9484	12838
PFC-51-14		n-C6F14	5890	8780	11504.8
PFC-61-16		n-C7F16	5830	8681	11301.3
PFC-71-18		C8F18	5680	8456	11042.5
PFC-91-18		C10F18	5390	7977	9686.15
Perfluorodecalin(cis)		Z-C10F18	5430	8033	9759.04
Perfluorodecalin(trans)		E-C10F18	4720	6980	8505.21
PFC-1114	tetrafluoroethylene	CF2=CF2	0	0	0.000489073
PFC-1216		CF3CF=CF2	0	0	0.0117159
Perfluorobuta-1,3-diene		CF2=CFCF=CF2	0	0	0.000600392
Perfluorobut-1-ene		CF3CF2CF=CF2	0	0	0.0152927
Perfluorobut-2-ene		CF3CF=CFCF3	6	2	0.295634
Halogenated alcohols and ethers
HFE-125		CHF2OCF3	12400	13951	3657.51
HFE-134 (HG-00)		CHF2OCHF2	11600	6512	946.209
HFE-143a		CH3OCF3	1890	632	87.5434
HFE-227ea		CF3CHFOCF3	8900	7377	1261.46
HCFE-235ca2(enflurane)		CHF2OCF2CHFCl	2120	705	97.6422
HCFE-235da2(isoflurane)		CHF2OCHClCF3	1800	595	82.1648
HFE-236ca		CHF2OCF2CHF2	9710	4990	715.344
HFE-236ea2(desflurane)		CHF2OCHFCF3	5550	2143	300.098
HFE-236fa		CF3CH2OCF3	3350	1177	163.817
HFE-245cb2		CF3CF2OCH3	2360	790	109.506
HFE-245fa1		CHF2CH2OCF3	2900	997	138.477
HFE-245fa2		CHF2OCH2CF3	2910	981	135.92
2,2,3,3,3-Pentafluoropropan-1-ol		CF3CF2CH2OH	69	23	3.13883
HFE-254cb1		CH3OCF2CHF2	1110	365	50.3757
HFE-263fb2		CF3CH2OCH3	5	2	0.222638
HFE-263m1		CF3OCH2CH3	108	36	4.92723
3,3,3-Trifluoropropan-1-ol		CF3CH2CH2OH	1	0	0.0651489
HFE-329mcc2		CHF2CF2OCF2CF3	6720	3598	519.752
HFE-338mmz1		(CF3)2CHOCHF2	5940	3081	442.092
HFE-338mcf2		CF3CH2OCF2CF3	3180	1118	155.501
Sevoflurane (HFE-347mmz1)		(CF3)2CHOCH2F	795	262	36.135
HFE-347mcc3 (HFE-7000)		CH3OCF2CF2CF3	1910	641	88.7739
HFE-347mcf2		CHF2CH2OCF2CF3	2990	1028	142.872
HFE-347pcf2		CHF2CF2OCH2CF3	3150	1072	148.736
HFE-347mmy1		(CF3)2CFOCH3	1330	440	60.8146
HFE-356mec3		CH3OCF2CHFCF3	1410	468	64.7691
HFE-356mff2		CF3CH2OCH2CF3	62	20	2.81034
HFE-356pcf2		CHF2CH2OCF2CHF2	2560	867	120.329
HFE-356pcf3		CHF2OCH2CF2CHF2	1640	540	74.6703
HFE-356pcc3		CH3OCF2CF2CHF2	1510	500	69.1603
HFE-356mmz1		(CF3)2CHOCH3	50	17	2.28112
HFE-365mcf3		CF3CF2CH2OCH3	3	1	0.155299
HFE-365mcf2		CF3CF2OCH2CH3	215	71	9.76321
HFE-374pc2		CHF2CF2OCH2CH3	2260	758	104.981
4,4,4-Trifluorobutan-1-ol		CF3(CH2)2CH2OH	0	0	0.00315708
2,2,3,3,4,4,5,5-Octafluorocyclopentanol		(CF2)4CH(OH)	47	16	2.15338
HFE-43-10pccc124(H-Galden 1040x,HG-11)		CHF2OCF2OC2F4OCHF2	8010	3353	471.727
HFE-449s1 (HFE-7100)		C4F9OCH3	1530	509	70.3927
n-HFE-7100		n-C4F9OCH3	1760	587	81.2371
i-HFE-7100		i-C4F9OCH3	1480	492	68.0958
HFE-569sf2 (HFE-7200)		C4F9OC2H5	209	69	9.50772
n-HFE-7200		n-C4F9OC2H5	237	79	10.8034
i-HFE-7200		i-C4F9OC2H5	163	54	7.40909
HFE-236ca12 (HG-10)		CHF2OCF2OCHF2	11000	6260	912.04
HFE-338pcc13 (HG-01)		CHF2OCF2CF2OCHF2	8430	3466	486.945
1,1,1,3,3,3-Hexafluoropropan-2-ol		(CF3)2CHOH	668	221	30.4762
HG-02		HF2C–(OCF2CF2)2–OCF2H	7900	3250	456.371
HG-03		HF2C–(OCF2CF2)3–OCF2H	8270	3400	477.748
HG-20		HF2C–(OCF2)2–OCF2H	10900	6201	904.079
HG-21		HF2C–OCF2CF2OCF2OCF2O–CF2H	11100	4628	651.859
HG-30		HF2C–(OCF2)3–OCF2H	15100	8575	1250.22
1-Ethoxy-1,1,2,2,3,3,3-heptafluoropropane		CF3CF2CF2OCH2CH3	223	74	10.1464
Fluoroxene		CF3CH2OCH=CH2	0	0	0.00906975
1,1,2,2-Tetrafluoro-1-(fluoromethoxy)ethane		CH2FOCF2CF2H	3080	1051	145.88
2-Ethoxy-3,3,4,4,5-pentafluorotetrahydro-2,5-bis[1,2,2,2-tetrafluoro-1-(trifluoromethyl)ethyl]-furan		C12H5F19O2	204	68	9.28874
Fluoro(methoxy)methane		CH3OCH2F	46	15	2.09863
Difluoro(methoxy)methane		CH3OCHF2	528	175	24.0887
Fluoro(fluoromethoxy)methane		CH2FOCH2F	479	159	21.8988
Difluoro(fluoromethoxy)methane		CH2FOCHF2	2260	748	103.319
Trifluoro(fluoromethoxy)methane		CH2FOCF3	2730	909	125.764
HG'-01		CH3OCF2CF2OCH3	815	269	37.0463
HG'-02		CH3O(CF2CF2O)2CH3	868	287	39.4187
HG'-03		CH3O(CF2CF2O)3CH3	812	268	37.0463
HFE-329me3		CF3CFHCF2OCF3	7170	5241	829.615
3,3,4,4,5,5,6,6,7,7,7-Undecafluoroheptan-1-ol		CF3(CF2)4CH2CH2OH	2	1	0.0713535
3,3,4,4,5,5,6,6,7,7,8,8,9,9,9-Pentadecafluorononan-1-ol		CF3(CF2)6CH2CH2OH	1	0	0.054747
3,3,4,4,5,5,6,6,7,7,8,8,9,9,10,10,11,11,11-Nonadecafluoroundecan-1-ol		CF3(CF2)8CH2CH2OH	1	0	0.0313883
2-Chloro-1,1,2-trifluoro-1-methoxyethane		CH3OCF2CHFCl	449	149	20.4389
PFPMIE(perfluoropolymethylisopropyl ether)		CF3OCF(CF3)CF2OCF2OCF3	7500	10789	9861.88
HFE-216		CF3OCF=CF2	1	0	0.0350381
Trifluoromethylformate		HCOOCF3	2150	712	98.3417
Perfluoroethylformate		HCOOCF2CF3	2130	703	97.0622
Perfluoropropylformate		HCOOCF2CF2CF3	1380	456	62.9734
Perfluorobutylformate		HCOOCF2CF2CF2CF3	1440	475	65.5556
2,2,2-Trifluoroethylformate		HCOOCH2CF3	123	41	5.60244
3,3,3-Trifluoropropylformate		HCOOCH2CH2CF3	64	21	2.91984
1,2,2,2-Tetrafluoroethylformate		HCOOCHFCF3	1720	569	78.6378
1,1,1,3,3,3-Hexafluoropropan-2-ylformate		HCOOCH(CF3)2	1220	403	55.7132
Perfluorobutylacetate		CH3COOCF2CF2CF2CF3	6	2	0.277385
Perfluoropropylacetate		CH3COOCF2CF2CF3	6	2	0.290159
Perfluoroethylacetate		CH3COOCF2CF3	8	3	0.344906
Trifluoromethylacetate		CH3COOCF3	8	3	0.346731
Methylcarbonofluoridate		FCOOCH3	350	116	15.9497
1,1-Difluoroethylcarbonofluoridate		FCOOCF2CH3	99	33	4.48925
1,1-Difluoroethyl2,2,2-trifluoroacetate		CF3COOCF2CH3	113	38	5.16446
Ethyl 2,2,2-trifluoroacetate		CF3COOCH2CH3	5	2	0.229937
2,2,2-Trifluoroethyl2,2,2-trifluoroacetate		CF3COOCH2CF3	25	8	1.14421
Methyl 2,2,2-trifluoroacetate		CF3COOCH3	192	64	8.75951
Methyl 2,2-difluoroacetate		HCF2COOCH3	12	4	0.54747
Difluoromethyl 2,2,2-trifluoroacetate		CF3COOCHF2	99	33	4.52575
2,2,3,3,4,4,4-Heptafluorobutan-1-ol		C3F7CH2OH	124	41	5.65719
1,1,2-Trifluoro-2-(trifluoromethoxy)-ethane		CHF2CHFOCF3	3970	1489	207.949
1-Ethoxy-1,1,2,3,3,3-hexafluoropropane		CF3CHFCF2OCH2CH3	86	28	3.90528
1,1,1,2,2,3,3-Heptafluoro-3-(1,2,2,2-tetrafluoroethoxy)-propane		CF3CF2CF2OCHFCF3	7940	7371	1400.39
2,2,3,3-Tetrafluoro-1-propanol		CHF2CF2CH2OH	48	16	2.17163
2,2,3,4,4,4-Hexafluoro-1-butanol		CF3CHFCF2CH2OH	63	21	2.84684
2,2,3,3,4,4,4-Heptafluoro-1-butanol		CF3CF2CF2CH2OH	60	20	2.7191
1,1,2,2-Tetrafluoro-3-methoxy-propane		CHF2CF2CH2OCH3	2	1	0.0879601
perfluoro-2-methyl-3-pentanone		CF3CF2C(O)CF(CF3)2	0	0	0.0166796
3,3,3-Trifluoropropanal		CF3CH2CHO	0	0	0.00179935
2-Fluoroethanol		CH2FCH2OH	3	1	0.147269
2,2-Difluoroethanol		CHF2CH2OH	11	4	0.507322
2,2,2-Trifluoroethanol		CF3CH2OH	73	24	3.33957
1,1'-Oxybis[2-(difluoromethoxy)-1,1,2,2-tetrafluoroethane		HCF2O(CF2CF2O)2CF2H	9910	5741	840.479
1,1,3,3,4,4,6,6,7,7,9,9,10,10,12,12-hexadecafluoro-2,5,8,11-Tetraoxadodecane		HCF2O(CF2CF2O)3CF2H	9050	5245	768.41
1,1,3,3,4,4,6,6,7,7,9,9,10,10,12,12,13,13,15,15-eicosafluoro-2,5,8,11,14-Pentaoxapentadecane		HCF2O(CF2CF2O)4CF2H	7320	4240	621.639
Hydrocarbons, chlorinated			30.2	13.8	1.97

## Sheet: Stratospheric ozone depletion
Stratospheric ozone depletion		ODP20	ODP100	ODPinfinite
		(kg CFC11-eq/ kg ODS)	(kg CFC11-eq/ kg ODS)	(kg CFC11-eq/ kg ODS)
Name	Alternative name (=name in emission database if different)	Individualist	Hierarchist	Egalitarian
Annex A-I
CFC-11		1	1	1
CFC-12		0.421	0.587	0.82
CFC-113		0.504	0.664	0.85
CFC-114		0.165	0.27	0.58
CFC-115		0.032	0.061	0.57
Annex A-II
Halon-1301	H-1301	11.841	14.066	15.9
Halon-1211	H-1211	15.053	8.777	7.9
Halon-2402	H-2402	22.2	14.383	13
Annex B-II
CCl4	tetrachloromethane (carbon tetrachloride)	1.203	0.895	0.82
Annex B-III
CH3CCl3	1,1,1,-trichloroethane (methyl chloroform)	0.396	0.178	0.16
Annex C-I
HCFC-22		0.085	0.045	0.04
HCFC-123		0.025	0.011	0.01
HCFC-124		0.049	0.022	0.02
HCFC-141b		0.275	0.134	0.12
HCFC-142b		0.111	0.067	0.06
HCFC-225ca		0.05	0.022	0.02
HCFC-225cb		0.073	0.033	0.03
Annex E
CH3Br		1.649	0.734	0.66
Others
Halon-1202		4.247	1.892	1.7
CH3Cl		0.05	0.022	0.02
N2O	dinitrogen oxide (nitrous oxide)	0.007	0.011	0.017
Hydrocarbons, chlorinated		0.0129	0.00726	0.00662

## Sheet: Ionizing radiation
Ionizing radiation				IRP	IRP	IRP
				kBq Co-60 to air eq/kBq	kBq Co-60 to air eq/kBq	kBq Co-60 to air eq/kBq
Name	Alternative name	Concatenated name	Emission compartment	Individualist	Hierarchist	Egalitarian
Am-241	Americium 241	Americium 241air	air	54.5	54.5	55.5
C-14	Carbon 14	Carbon 14air	air	0.614	1.15	12.9
Co-58			air	0.0255	0.0255	0.0255
Co-60	Cobalt 60	Cobalt 60air	air	1	1	1
Cs-134	Caesium 134	Caesium 134air	air	0.718	0.718	0.718
Cs-137	Caesium 137	Caesium 137air	air	1.27	1.64	1.64
H-3	Tritium	Tritiumair	air	0.000855	0.000856	0.000856
I-129	Iodine 129	Iodine 129air	air	8.32	10.5	207
I-131	Iodine 131	Iodine 131air	air	0.00909	0.00909	0.00909
I-133			air	0.000564	0.000564	0.000564
Kr-85	Krypton 85	Krypton 85air	air	6.03e-06	8.48e-06	8.48e-06
Pb-210			air	0	0.0909	0.0909
Po-210			air	0.0909	0.0909	0.0909
Pu alpha			air	0	0	5
Pu-238			air	0	0	4
Pu-239	Plutonium 239	Plutonium 239air	air	31.8	31.8	31.8
Ra-226			air	0	0	0.0545
Rn-222	Radon 222	Radon 222air	air	0.00145	0.00145	0.00145
Ru-106	Ruthenium 106	Ruthenium 106air	air	0.1	0.1	0.1
Sr-90	Strontium 90	Strontium 90air	air	1.52	2.45	2.45
Tc-99	Technetium 99	Technetium 99air	air	0.757	1.18	1.18
Th-230	Thorium 230	Thorium 230air	air	0	0	2.73
U-234a	Uranium 234	Uranium 234air	air	0	0	5.82
U-235a	Uranium 235	Uranium 235air	air	0	0	1.27
U-238a	Uranium 238	Uranium 238air	air	0	0	0.491
Xe-133			air	8.55e-06	8.55e-06	8.55e-06
Actinides, unspecified			air	1.58	1.58	4.16
Noble gases, radioactive, unspecified			air	5.62e-06	7.88e-06	7.88e-06
Emissions to freshwater (rivers and lakes)
Ag-110m			fresh water	0.03	0.03	0.03
Am-241	Americium 241	Americium 241fresh water	fresh water	0.00336	0.00345	0.00364
C-14	Carbon 14	Carbon 14fresh water	fresh water	0.00345	0.00609	0.0127
Co-58			fresh water	0.00245	0.00245	0.00245
Co-60	Cobalt 60	Cobalt 60fresh water	fresh water	2.64	2.64	2.64
Cs-134	Caesium 134	Caesium 134fresh water	fresh water	8.64	8.64	8.64
Cs-137	Caesium 137	Caesium 137fresh water	fresh water	9.09	10	10
H-3	Tritium	Tritiumfresh water	fresh water	4.07e-05	4.12e-05	4.12e-05
I-129	Iodine 129	Iodine 129fresh water	fresh water	0.252	0.287	155
I-131	Iodine 131	Iodine 131fresh water	fresh water	0.03	0.03	0.03
Mn-54			fresh water	0.0191	0.0191	0.0191
Pu-239	Plutonium 239	Plutonium 239fresh water	fresh water	0.000345	0.000373	0.000418
Ra-226a			fresh water	-	-	0.00773
Ru-106	Ruthenium 106	Ruthenium 106fresh water	fresh water	0.000236	0.000236	0.000236
Sb-124			fresh water	0.0491	0.0491	0.0491
Sr-90	Strontium 90	Strontium 90fresh water	fresh water	0.0127	0.0245	0.0282
Tc-99	Technetium 99	Technetium 99fresh water	fresh water	0.00755	0.0309	0.0309
U-234a	Uranium 234	Uranium 234fresh water	fresh water	0	0	0.145
U-235a	Uranium 235	Uranium 235fresh water	fresh water	0	0	0.136
U-238a	Uranium 238	Uranium 238fresh water	fresh water	0	0	0.136
Actinides, unspecified			fresh water	3.05e-05	3.14e-05	0.00292
Emissions to the marine environment
Am-241	Americium 241	Americium 241marine water	marine water	0.0473	0.0482	0.0482
C-14	Carbon 14	Carbon 14marine water	marine water	0.0273	0.0273	0.0273
Cm alphaa			marine water	0	0	3.45
Co-60	Cobalt 60	Cobalt 60marine water	marine water	0.0236	0.0236	0.0236
Cs-134	Caesium 134	Caesium 134marine water	marine water	0.00473	0.00473	0.00473
Cs-137	Caesium 137	Caesium 137marine water	marine water	0.00582	0.00582	0.00582
H-3	Tritium	Tritiummarine water	marine water	3.6e-06	4.05e-06	4.05e-06
I-129	Iodine 129	Iodine 129marine water	marine water	0.0222	0.03	155
Pu alphaa			marine water	0	0	4.45
Pu-239	Plutonium 239	Plutonium 239marine water	marine water	0.00527	0.00536	0.00573
Ru-106	Ruthenium 106	Ruthenium 106marine water	marine water	0.00109	0.00109	0.00109
Sb-125	Antimony 125	Antimony 125marine water	marine water	0.000891	0.000891	0.000891
Sr-90	Strontium 90	Strontium 90marine water	marine water	0.000455	0.000455	0.000455
Tc-99	Technetium 99	Technetium 99marine water	marine water	7.82e-05	7.91e-05	0.000109
U-234a	Uranium 234	Uranium 234marine water	marine water	0	0	0.00136
U-235a	Uranium 235	Uranium 235marine water	marine water	0	0	0.00203
U-238a	Uranium 238	Uranium 238marine water	marine water	0	0	0.000833
Actinides, unspecified			marine water	0.00043	0.000438	0.000461

## Sheet: Human damage ozone formation
Photochemical ozone formation				HOFP	HOFP	HOFP
				kg NOx-eq/kg	kg NOx-eq/kg	kg NOx-eq/kg
CAS nr	Substance name			I	H	E
NOx	nitrogen oxides (as nitrogen dioxide)		air	1	1	1
NMVOC (non-methane volatile organic chemicals)	NMVOC (non-methane volatile organic chemicals)		air	0.18	0.18	0.18
	NO		air	1.53	1.53	1.53
	NO3		air	0.74	0.74	0.74
74840	Ethane		air	0.0290125	0.0290125	0.0290125
74986	Propane		air	0.0507718	0.0507718	0.0507718
106978	Butane		air	0.112423	0.112423	0.112423
75285	i-Butane		air	0.101544	0.101544	0.101544
109660	Pentane		air	0.145062	0.145062	0.145062
78784	i-Pentane		air	0.123303	0.123303	0.123303
463821	Neopentane		air	0.065278	0.065278	0.065278
110543	Hexane		air	0.145062	0.145062	0.145062
107835	2-Methylpentane		air	0.148689	0.148689	0.148689
96140	3-Methylpentane		air	0.155942	0.155942	0.155942
75832	2,2-Dimethylbutane		air	0.0797843	0.0797843	0.0797843
79298	2,3-Dimethylbutane		air	0.181328	0.181328	0.181328
142825	Heptane		air	0.126929	0.126929	0.126929
591764	2-Methylhexane		air	0.11605	0.11605	0.11605
589344	3-Methylhexane		air	0.152315	0.152315	0.152315
111659	Octane		air	0.123303	0.123303	0.123303
592278	2-Methylheptane		air	0.123303	0.123303	0.123303
589811	3-Methylheptane		air	0.134183	0.134183	0.134183
111842	Nonane		air	0.123303	0.123303	0.123303
	2-Methyloctane		air	0.123303	0.123303	0.123303
	3-Methyloctane		air	0.123303	0.123303	0.123303
	4-Methyloctane		air	0.134183	0.134183	0.134183
	3,4-Dimethylheptane		air	0.130556	0.130556	0.130556
124185	Decane		air	0.130556	0.130556	0.130556
	2-Methylnonane		air	0.126929	0.126929	0.126929
	3-Methylnonane		air	0.141436	0.141436	0.141436
	4-Methylnonane		air	0.126929	0.126929	0.126929
	2,5-Dimethyloctane		air	0.137809	0.137809	0.137809
	2,6-Dimethyloctane		air	0.130556	0.130556	0.130556
	2-Methyl-3-ethylheptane		air	0.123303	0.123303	0.123303
	2,2-Dimethyl-3,3-dimethylhexane		air	0.0689046	0.0689046	0.0689046
1120214	Undecane		air	0.130556	0.130556	0.130556
	2-Methyldecane		air	0.123303	0.123303	0.123303
	3-Methyldecane		air	0.130556	0.130556	0.130556
	4-Methyldecane		air	0.130556	0.130556	0.130556
	5-Methyldecane		air	0.126929	0.126929	0.126929
112403	Dodecane		air	0.119676	0.119676	0.119676
629505	Tridecane		air	0.152315	0.152315	0.152315
629594	Tetradecane		air	0.166822	0.166822	0.166822
96377	Methylcyclopentane		air	0.177701	0.177701	0.177701
110827	Cyclohexane		air	0.101544	0.101544	0.101544
108872	Methylcyclohexane		air	0.235726	0.235726	0.235726
	Ethylcyclohexane		air	0.228473	0.228473	0.228473
	Propylcyclohexane		air	0.217593	0.217593	0.217593
	1,2,3-Trimethylcyclohexane		air	0.206714	0.206714	0.206714
	i-Propylcyclohexane		air	0.217593	0.217593	0.217593
	Butylcyclohexane		air	0.213967	0.213967	0.213967
	i-Butylcyclohexane		air	0.213967	0.213967	0.213967
	1-Methyl-3-propylcyclohexane		air	0.217593	0.217593	0.217593
	1-Methyl-4-propylcyclohexane		air	0.203087	0.203087	0.203087
	Pentylcyclohexane		air	0.203087	0.203087	0.203087
	Hexylcyclohexane		air	0.203087	0.203087	0.203087
74851	Ethylene		air	0.362656	0.362656	0.362656
115071	Propylene		air	0.424307	0.424307	0.424307
106989	But-1-ene		air	0.377162	0.377162	0.377162
	Cis-but-2-ene		air	0.409801	0.409801	0.409801
	Trans-but-2-ene		air	0.420681	0.420681	0.420681
	Butylene		air	0.228473	0.228473	0.228473		Nb Cas number for 1-Butylene
106990	1,3-Butadiene		air	0.322764	0.322764	0.322764
	Cis-pent-2-ene		air	0.395295	0.395295	0.395295
	Trans-pent-2-ene		air	0.402548	0.402548	0.402548
109671	1-Pentene		air	0.344523	0.344523	0.344523
563462	2-Methylbut-1-ene		air	0.271992	0.271992	0.271992
563451	3-Methylbut-1-ene		air	0.264739	0.264739	0.264739
513359	2-Methylbut-2-ene		air	0.297378	0.297378	0.297378
78795	Isoprene		air	0.413428	0.413428	0.413428
592416	Hex-1-ene		air	0.319137	0.319137	0.319137
	Cis-hex-2-ene		air	0.377162	0.377162	0.377162
	Trans-hex-2-ene		air	0.369909	0.369909	0.369909
	Alpha-pinene		air	0.246606	0.246606	0.246606
	Beta-pinene		air	0.119676	0.119676	0.119676
138863	Limonene		air	0.257486	0.257486	0.257486
	2-Methyl-3-butenol		air	-0.00725311	-0.00725311	-0.00725311
71432	Benzene		air	0.0362656	0.0362656	0.0362656
108883	Toluene		air	0.159569	0.159569	0.159569
95476	o-Xylene		air	0.282871	0.282871	0.282871
108383	m-Xylene		air	0.311884	0.311884	0.311884
106423	p-Xylene		air	0.261112	0.261112	0.261112
100414	Ethylbenzene		air	0.166822	0.166822	0.166822
	Propylbenzene		air	0.137809	0.137809	0.137809
98828	i-Propylbenzene		air	0.11605	0.11605	0.11605
526738	1,2,3-Trimethylbenzene		air	0.380788	0.380788	0.380788
95636	1,2,4-Trimethylbenzene		air	0.398921	0.398921	0.398921
108678	1,3,5-Trimethylbenzene		air	0.388042	0.388042	0.388042
611143	o-Ethyltoluene		air	0.264739	0.264739	0.264739
620144	m-Ethyltoluene		air	0.282871	0.282871	0.282871
622968	p-Ethyltoluene		air	0.228473	0.228473	0.228473
29224553	3,5-Dimethylethylbenzene		air	0.377162	0.377162	0.377162
25550134	3,5-Diethyltoluene		air	0.355403	0.355403	0.355403
	1,2,3,5-Tetramethylbenzene		air	0.377162	0.377162	0.377162
	1,2,4,5-Tetramethylbenzene		air	0.362656	0.362656	0.362656
	1-Methyl-4-i-propylbenzene		air	0.271992	0.271992	0.271992
	1-Methyl-3-i-propylbenzene		air	0.319137	0.319137	0.319137
100425	Styrene		air	0.0181328	0.0181328	0.0181328
50000	Formaldehyde		air	0.166822	0.166822	0.166822
75070	Acetaldehyde		air	0.199461	0.199461	0.199461
123386	Propionaldehyde		air	0.261112	0.261112	0.261112
	i-Propionaldehyde		air	0.181328	0.181328	0.181328
123728	Butyraldehyde		air	0.253859	0.253859	0.253859
	Pentanal		air	0.257486	0.257486	0.257486
	3-Methylbutanal		air	0.148689	0.148689	0.148689
100527	Benzaldehyde		air	-0.0689046	-0.0689046	-0.0689046
	2-Methylbenzaldehyde		air	-0.101544	-0.101544	-0.101544
	3-Methylbenzaldehyde		air	-0.065278	-0.065278	-0.065278
	4-Methylbenzaldehyde		air	0.0181328	0.0181328	0.0181328
67561	Methanol		air	0.0471452	0.0471452	0.0471452
64175	Ethanol		air	0.123303	0.123303	0.123303
71238	Propanol		air	0.174075	0.174075	0.174075
67630	i-Propanol		air	0.065278	0.065278	0.065278
71363	Butanol		air	0.188581	0.188581	0.188581
78831	i-Butanol		air	0.130556	0.130556	0.130556
78922	sec-butanol		air	0.145062	0.145062	0.145062
75650	t-Butanol		air	0.00725311	0.00725311	0.00725311
123513	3-Methyl-1-butanol		air	0.159569	0.159569	0.159569
108952	Phenol		air	-0.0181328	-0.0181328	-0.0181328
95487	o-Cresol		air	0.0689046	0.0689046	0.0689046
95874	2,5-Xylenol		air	0.199461	0.199461	0.199461
105679	2,4-Xylenol		air	0.195834	0.195834	0.195834
526750	2,3-Xylenol		air	0.123303	0.123303	0.123303
108930	Cyclohexanol		air	0.163195	0.163195	0.163195
123422	Diacetone alcohol		air	0.10517	0.10517	0.10517
67641	Acetone		air	0.0217593	0.0217593	0.0217593
78933	Methylethylketone		air	0.11605	0.11605	0.11605
108101	Methyl-i-butylketone		air	0.188581	0.188581	0.188581
108941	Cyclohexanone		air	0.10517	0.10517	0.10517
107879	Methylpropylketone		air	-0.00362656	-0.00362656	-0.00362656
107313	Methyl formate		air	0.0108797	0.0108797	0.0108797
79209	Methyl acetate		air	0.0253859	0.0253859	0.0253859
141786	Ethyl acetate		air	0.0689046	0.0689046	0.0689046
108214	i-Propyl acetate		air	0.0761577	0.0761577	0.0761577
123864	Butyl acetate		air	0.0942905	0.0942905	0.0942905
	n-Propyl acetate		air	0.0870374	0.0870374	0.0870374
64186	Formic acid		air	0.0108797	0.0108797	0.0108797
64197	Acetic acid		air	0.032639	0.032639	0.032639
79094	Propanoic acid		air	0.0471452	0.0471452	0.0471452
115106	Dimethylether		air	0.065278	0.065278	0.065278
60297	Diethylether		air	0.166822	0.166822	0.166822
108203	Di-i-propylether		air	0.159569	0.159569	0.159569
107211	Ethylene glycol		air	0.119676	0.119676	0.119676
57556	Propylene glycol		air	0.141436	0.141436	0.141436
111762	2-Butoxyethanol		air	0.163195	0.163195	0.163195
107982	1-Methoxy-2-propanol		air	0.123303	0.123303	0.123303
109864	2-Methoxyethanol		air	0.10517	0.10517	0.10517
110805	2-Ethoxyethanol		air	0.134183	0.134183	0.134183
107028	Acrolein		air	0.195834	0.195834	0.195834
78853	Methacrolein		air	0.333643	0.333643	0.333643
107222	Glyoxal		air	0.0797843	0.0797843	0.0797843
78988	Methylglyoxal		air	0.366282	0.366282	0.366282
74862	Acetylene		air	0.0253859	0.0253859	0.0253859
74997	Propyne		air	0.264739	0.264739	0.264739
75092	Methylene dichloride		air	0.0108797	0.0108797	0.0108797
75003	Ethyl chloride		air	0.0398921	0.0398921	0.0398921
127184	Tetrachloroethylene		air	0.00362656	0.00362656	0.00362656
79016	Trichloroethylene		air	0.10517	0.10517	0.10517
75343	Ethylidene dichloride		air	0.195834	0.195834	0.195834
71556	Methyl chloroform		air	-0.00362656	-0.00362656	-0.00362656
74873	Methyl chloride		air	0.00362656	0.00362656	0.00362656
156592	Cis-dichloroethylene		air	0	0	0
156605	Trans-dichloroethylene		air	-0.00362656	-0.00362656	-0.00362656
67663	Chloroform		air	0	0	0
	Aldehydes, unspecified		air	0.174	0.174	0.174
	Carboxylic acids		air	0.00463	0.00463	0.00463
	Hydrocarbons, chlorinated		air	0.0266	0.0266	0.0266
	Hydrocarbons, aliphatic, alkanes, cyclic		air	0.0984	0.0984	0.0984
	Hydrocarbons, aromatic		air	0.163	0.163	0.163

## Sheet: Particulate matter formation
Fine particulate matter formation		PMFP	PMFP	PMFP
		kg PM2.5-eq/kg	kg PM2.5-eq/kg	kg PM2.5-eq/kg
Pollutant	Emitted substance	Individualist	Hierarchist	Egalitarian
PM2.5	NH3	0	0.24	0.24
PM2.5	NOx	0	0.11	0.11
PM2.5	SO2	0	0.29	0.29
PM2.5	PM2.5	1	1	1
PM2.5	NO	0	0.17	0.17
PM2.5	NO2	0	0.11	0.11
PM2.5	NO3	0	0.08	0.08
PM2.5	SO	0	0.39	0.39
PM2.5	SOx	0	0.29	0.29
PM2.5	SO3	0	0.23	0.23

## Sheet: Ecosyste damage ozone formation
Photochemical ozone formation				EOFP	EOFP	EOFP
				kg NOx-eq/kg	kg NOx-eq/kg	kg NOx-eq/kg
CAS nr	Substance name			I	H	E
NOx	nitrogen oxides (as nitrogen dioxide)		air	1	1	1
NMVOC (non-methane volatile organic chemicals)	NMVOC (non-methane volatile organic chemicals)		air	0.29	0.29	0.29
	NO		air	1.53	1.53	1.53
	NO3		air	0.74	0.74	0.74
74840	Ethane		air	0.0467601	0.0467601	0.0467601
74986	Propane		air	0.0818301	0.0818301	0.0818301
106978	Butane		air	0.181195	0.181195	0.181195
75285	i-Butane		air	0.16366	0.16366	0.16366
109660	Pentane		air	0.2338	0.2338	0.2338
78784	i-Pentane		air	0.19873	0.19873	0.19873
463821	Neopentane		air	0.10521	0.10521	0.10521
110543	Hexane		air	0.2338	0.2338	0.2338
107835	2-Methylpentane		air	0.239645	0.239645	0.239645
96140	3-Methylpentane		air	0.251335	0.251335	0.251335
75832	2,2-Dimethylbutane		air	0.12859	0.12859	0.12859
79298	2,3-Dimethylbutane		air	0.29225	0.29225	0.29225
142825	Heptane		air	0.204575	0.204575	0.204575
591764	2-Methylhexane		air	0.18704	0.18704	0.18704
589344	3-Methylhexane		air	0.24549	0.24549	0.24549
111659	Octane		air	0.19873	0.19873	0.19873
592278	2-Methylheptane		air	0.19873	0.19873	0.19873
589811	3-Methylheptane		air	0.216265	0.216265	0.216265
111842	Nonane		air	0.19873	0.19873	0.19873
3221612	2-Methyloctane		air	0.19873	0.19873	0.19873
2216333	3-Methyloctane		air	0.19873	0.19873	0.19873
2216344	4-Methyloctane		air	0.216265	0.216265	0.216265
922281	3,4-Dimethylheptane		air	0.21042	0.21042	0.21042
124185	Decane		air	0.21042	0.21042	0.21042
871930	2-Methylnonane		air	0.204575	0.204575	0.204575
5911046	3-Methylnonane		air	0.227955	0.227955	0.227955
17301949	4-Methylnonane		air	0.204575	0.204575	0.204575
15869893	2,5-Dimethyloctane		air	0.22211	0.22211	0.22211
2051301	2,6-Dimethyloctane		air	0.21042	0.21042	0.21042
14676290	2-Methyl-3-ethylheptane		air	0.19873	0.19873	0.19873
13475815	2,2-Dimethyl-3,3-dimethylhexane		air	0.111055	0.111055	0.111055
1120214	Undecane		air	0.21042	0.21042	0.21042
6975980	2-Methyldecane		air	0.19873	0.19873	0.19873
13151343	3-Methyldecane		air	0.21042	0.21042	0.21042
2847725	4-Methyldecane		air	0.21042	0.21042	0.21042
13151354	5-Methyldecane		air	0.204575	0.204575	0.204575
112403	Dodecane		air	0.192885	0.192885	0.192885
629505	Tridecane		air	0.24549	0.24549	0.24549
629594	Tetradecane		air	0.26887	0.26887	0.26887
96377	Methylcyclopentane		air	0.286405	0.286405	0.286405
110827	Cyclohexane		air	0.16366	0.16366	0.16366
108872	Methylcyclohexane		air	0.379926	0.379926	0.379926
1678917	Ethylcyclohexane		air	0.368236	0.368236	0.368236
1678928	Propylcyclohexane		air	0.3507	0.3507	0.3507
1678973	1,2,3-Trimethylcyclohexane		air	0.333165	0.333165	0.333165
696297	i-Propylcyclohexane		air	0.3507	0.3507	0.3507
1678939	Butylcyclohexane		air	0.344855	0.344855	0.344855
1678984	i-Butylcyclohexane		air	0.344855	0.344855	0.344855
4291809	1-Methyl-3-propylcyclohexane		air	0.3507	0.3507	0.3507
4291810	1-Methyl-4-propylcyclohexane		air	0.32732	0.32732	0.32732
4292926	Pentylcyclohexane		air	0.32732	0.32732	0.32732
4292755	Hexylcyclohexane		air	0.32732	0.32732	0.32732
74851	Ethylene		air	0.584501	0.584501	0.584501
115071	Propylene		air	0.683866	0.683866	0.683866
106989	But-1-ene		air	0.607881	0.607881	0.607881
590181	Cis-but-2-ene		air	0.660486	0.660486	0.660486
624646	Trans-but-2-ene		air	0.678021	0.678021	0.678021
106989	Butylene		air	0.368236	0.368236	0.368236		Nb Cas number for 1-Butylene
106990	1,3-Butadiene		air	0.520206	0.520206	0.520206
627203	Cis-pent-2-ene		air	0.637106	0.637106	0.637106
646048	Trans-pent-2-ene		air	0.648796	0.648796	0.648796
109671	1-Pentene		air	0.555276	0.555276	0.555276
563462	2-Methylbut-1-ene		air	0.438376	0.438376	0.438376
563451	3-Methylbut-1-ene		air	0.426686	0.426686	0.426686
513359	2-Methylbut-2-ene		air	0.479291	0.479291	0.479291
78795	Isoprene		air	0.666331	0.666331	0.666331
592416	Hex-1-ene		air	0.514361	0.514361	0.514361
7688213	Cis-hex-2-ene		air	0.607881	0.607881	0.607881
9016802	Trans-hex-2-ene		air	0.596191	0.596191	0.596191
80568	Alpha-pinene		air	0.397461	0.397461	0.397461
127913	Beta-pinene		air	0.192885	0.192885	0.192885
138863	Limonene		air	0.414996	0.414996	0.414996
4516909	2-Methyl-3-butenol		air	-0.01169	-0.01169	-0.01169
71432	Benzene		air	0.0584501	0.0584501	0.0584501
108883	Toluene		air	0.25718	0.25718	0.25718
95476	o-Xylene		air	0.455911	0.455911	0.455911
108383	m-Xylene		air	0.502671	0.502671	0.502671
106423	p-Xylene		air	0.420841	0.420841	0.420841
100414	Ethylbenzene		air	0.26887	0.26887	0.26887
103651	Propylbenzene		air	0.22211	0.22211	0.22211
98828	i-Propylbenzene		air	0.18704	0.18704	0.18704
526738	1,2,3-Trimethylbenzene		air	0.613726	0.613726	0.613726
95636	1,2,4-Trimethylbenzene		air	0.642951	0.642951	0.642951
108678	1,3,5-Trimethylbenzene		air	0.625416	0.625416	0.625416
611143	o-Ethyltoluene		air	0.426686	0.426686	0.426686
620144	m-Ethyltoluene		air	0.455911	0.455911	0.455911
622968	p-Ethyltoluene		air	0.368236	0.368236	0.368236
29224553	3,5-Dimethylethylbenzene		air	0.607881	0.607881	0.607881
25550134	3,5-Diethyltoluene		air	0.572811	0.572811	0.572811
527537	1,2,3,5-Tetramethylbenzene		air	0.607881	0.607881	0.607881
95932	1,2,4,5-Tetramethylbenzene		air	0.584501	0.584501	0.584501
99876	1-Methyl-4-i-propylbenzene		air	0.438376	0.438376	0.438376
535773	1-Methyl-3-i-propylbenzene		air	0.514361	0.514361	0.514361
100425	Styrene		air	0.029225	0.029225	0.029225
50000	Formaldehyde		air	0.26887	0.26887	0.26887
75070	Acetaldehyde		air	0.321475	0.321475	0.321475
123386	Propionaldehyde		air	0.420841	0.420841	0.420841
	i-Propionaldehyde		air	0.29225	0.29225	0.29225
123728	Butyraldehyde		air	0.409151	0.409151	0.409151
100623	Pentanal		air	0.414996	0.414996	0.414996
590863	3-Methylbutanal		air	0.239645	0.239645	0.239645
100527	Benzaldehyde		air	-0.111055	-0.111055	-0.111055
529204	2-Methylbenzaldehyde		air	-0.16366	-0.16366	-0.16366
620235	3-Methylbenzaldehyde		air	-0.10521	-0.10521	-0.10521
104870	4-Methylbenzaldehyde		air	0.029225	0.029225	0.029225
67561	Methanol		air	0.0759851	0.0759851	0.0759851
64175	Ethanol		air	0.19873	0.19873	0.19873
71238	Propanol		air	0.28056	0.28056	0.28056
67630	i-Propanol		air	0.10521	0.10521	0.10521
71363	Butanol		air	0.30394	0.30394	0.30394
78831	i-Butanol		air	0.21042	0.21042	0.21042
78922	sec-butanol		air	0.2338	0.2338	0.2338
75650	t-Butanol		air	0.01169	0.01169	0.01169
123513	3-Methyl-1-butanol		air	0.25718	0.25718	0.25718
108952	Phenol		air	-0.029225	-0.029225	-0.029225
95487	o-Cresol		air	0.111055	0.111055	0.111055
95874	2,5-Xylenol		air	0.321475	0.321475	0.321475
105679	2,4-Xylenol		air	0.31563	0.31563	0.31563
526750	2,3-Xylenol		air	0.19873	0.19873	0.19873
108930	Cyclohexanol		air	0.263025	0.263025	0.263025
123422	Diacetone alcohol		air	0.169505	0.169505	0.169505
67641	Acetone		air	0.03507	0.03507	0.03507
78933	Methylethylketone		air	0.18704	0.18704	0.18704
108101	Methyl-i-butylketone		air	0.30394	0.30394	0.30394
108941	Cyclohexanone		air	0.169505	0.169505	0.169505
107879	Methylpropylketone		air	-0.00584501	-0.00584501	-0.00584501
107313	Methyl formate		air	0.017535	0.017535	0.017535
79209	Methyl acetate		air	0.0409151	0.0409151	0.0409151
141786	Ethyl acetate		air	0.111055	0.111055	0.111055
108214	i-Propyl acetate		air	0.122745	0.122745	0.122745
123864	Butyl acetate		air	0.15197	0.15197	0.15197
109604	n-Propyl acetate		air	0.14028	0.14028	0.14028
64186	Formic acid		air	0.017535	0.017535	0.017535
64197	Acetic acid		air	0.0526051	0.0526051	0.0526051
79094	Propanoic acid		air	0.0759851	0.0759851	0.0759851
115106	Dimethylether		air	0.10521	0.10521	0.10521
60297	Diethylether		air	0.26887	0.26887	0.26887
108203	Di-i-propylether		air	0.25718	0.25718	0.25718
107211	Ethylene glycol		air	0.192885	0.192885	0.192885
57556	Propylene glycol		air	0.227955	0.227955	0.227955
111762	2-Butoxyethanol		air	0.263025	0.263025	0.263025
107982	1-Methoxy-2-propanol		air	0.19873	0.19873	0.19873
109864	2-Methoxyethanol		air	0.169505	0.169505	0.169505
110805	2-Ethoxyethanol		air	0.216265	0.216265	0.216265
107028	Acrolein		air	0.31563	0.31563	0.31563
78853	Methacrolein		air	0.537741	0.537741	0.537741
107222	Glyoxal		air	0.12859	0.12859	0.12859
78988	Methylglyoxal		air	0.590346	0.590346	0.590346
74862	Acetylene		air	0.0409151	0.0409151	0.0409151
74997	Propyne		air	0.426686	0.426686	0.426686
75092	Methylene dichloride		air	0.017535	0.017535	0.017535
75003	Ethyl chloride		air	0.0642951	0.0642951	0.0642951
127184	Tetrachloroethylene		air	0.00584501	0.00584501	0.00584501
79016	Trichloroethylene		air	0.169505	0.169505	0.169505
75343	Ethylidene dichloride		air	0.31563	0.31563	0.31563
71556	Methyl chloroform		air	-0.00584501	-0.00584501	-0.00584501
74873	Methyl chloride		air	0.00584501	0.00584501	0.00584501
156592	Cis-dichloroethylene		air	0	0	0
156605	Trans-dichloroethylene		air	-0.00584501	-0.00584501	-0.00584501
67663	Chloroform		air	0	0	0
	Aldehydes, unspecified		air	0.281	0.281	0.281
	Carboxylic acids		air	0.00746	0.00746	0.00746
	Hydrocarbons, chlorinated		air	0.0429	0.0429	0.0429
	Hydrocarbons, aliphatic, alkanes, cyclic		air	0.159	0.159	0.159
	Hydrocarbons, aromatic		air	0.263	0.263	0.263

## Sheet: Terrestrial acidification
Terrestrial acidification	AP	AP	AP
	kg SO2-eq/kg	kg SO2-eq/kg	kg SO2-eq/kg
Substance name	Individualist	Hierarchist	Egalitarian
NOx	0.36	0.36	0.36
NH3	1.96	1.96	1.96
SO2	1	1	1
NO	0.552	0.552	0.552
NO2	0.36	0.36	0.36
NO3	0.27	0.27	0.27
SO	1.33	1.33	1.33
SOx	1	1	1
SO3	0.8	0.8	0.8
H2SO4 (sulphuric acid)	0.65	0.65	0.65

## Sheet: Freshwater eutrophication
Freshwater eutrophication		FEP	FEP	FEP
		kg P-eq. to freshwater/kg	kg P-eq. to freshwater/kg	kg P-eq. to freshwater/kg
Substance name	emission compartment	Individualist	Hierarchist	Egalitarian
Phosphorus (P)	freshwater	1	1	1
Phosphate (PO43-)	freshwater	0.33	0.33	0.33
Phosphoric acid	freshwater	0.32	0.32	0.32
Phosphorus pentoxide	freshwater	0.22	0.22	0.22
Phosphorus (P)	agricultural soil	0.1	0.1	0.1
Phosphate (PO43-)	agricultural soil	0.033	0.033	0.033
Phosphoric acid	agricultural soil	0.032	0.032	0.032
Phosphorus pentoxide	agricultural soil	0.022	0.022	0.022
Phosphorus (P)	sea water	0	0	0
Phosphate (PO43-)	sea water	0	0	0
Phosphoric acid	sea water	0	0	0
Phosphorus pentoxide	sea water	0	0	0

[truncated: 11 more sheets: Marine eutrophication, Terrestrial ecotoxicity, Freshwater ecotoxicity, Marine ecotoxicity, Human carcinogenic toxicity, Human noncarcinogenic toxicity, Land transformation, Land occupation, Water consumption, Mineral resource scarcity, Fossil resource scarcity]
